# Supplementary material for: Whole metagenome sequencing reveals links between mosquito microbiota and insecticide resistance in malaria vectors
Source: PubMed Central journal article supplement (PMC5794770; doi:10.1038/s41598-018-20367-4), 2018-02-01
Supplement: 41598_2018_20367_MOESM1_ESM.pdf [file 41598_2018_20367_MOESM1_ESM.pdf]

# Supplementary Information for, 'Whole metagenome sequencing reveals links between mosquito microbiota and insecticide resistance in malaria vectors'

Authors: Nsa Dada, Mili Sheth, Kelly Liebman, Jesus Pinto and Audrey Lenhart

**Supplementary Table 1. Comparative statistics of all bacteria taxa identified in FEN\_Res and FEN\_Sus.**

| S/N | Bacterial species                   | FEN_Res no. Reads | FEN_Res Rel. abundance (%) | FEN_Sus no. reads | FEN_Sus Rel. abundance (%) | Diff. Rel abundance (%) | 95% lower CI | 95% upper CI | p-values  | Corrected p-values |
|-----|-------------------------------------|-------------------|----------------------------|-------------------|----------------------------|-------------------------|--------------|--------------|-----------|--------------------|
| 1   | <i>[Enterobacter] aerogenes</i>     | 155090            | 0.300543511                | 81044             | 0.204298502                | 0.09624501              | 0.094194422  | 0.0982956    | <1E-301   | <1E-301            |
| 2   | <i>Acinetobacter baumannii</i>      | 1100441           | 2.132506299                | 1247329           | 3.144309828                | -1.011803529            | -1.01851378  | -1.005093    | <1E-301   | <1E-301            |
| 3   | <i>Acinetobacter calcoaceticus</i>  | 27313             | 0.052928912                | 36234             | 0.091339913                | -0.038411001            | -0.03954127  | -0.037281    | <1E-301   | <1E-301            |
| 4   | <i>Acinetobacter haemolyticus</i>   | 0                 | 0                          | 4355              | 0.010978234                | -0.010978234            | -0.01130427  | -0.010652    | <1E-301   | <1E-301            |
| 5   | <i>Acinetobacter johnsonii</i>      | 29309             | 0.056796891                | 9567              | 0.024116823                | 0.032680068             | 0.031870098  | 0.03349      | <1E-301   | <1E-301            |
| 6   | <i>Acinetobacter junii</i>          | 0                 | 0                          | 4672              | 0.011777338                | -0.011777338            | -0.01211503  | -0.01144     | <1E-301   | <1E-301            |
| 7   | <i>Acinetobacter nosocomialis</i>   | 5382              | 0.01042959                 | 18274             | 0.046065727                | -0.035636137            | -0.03635968  | -0.034913    | <1E-301   | <1E-301            |
| 8   | <i>Acinetobacter oleivorans</i>     | 5276              | 0.010224177                | 6780              | 0.017091257                | -0.00686708             | -0.00735859  | -0.006376    | 4.12E-174 | 9.16E-174          |
| 9   | <i>Acinetobacter pittii</i>         | 1660095           | 3.2170403                  | 2049567           | 5.16661896                 | -1.94957866             | -1.95798252  | -1.941175    | <1E-301   | <1E-301            |
| 10  | <i>Acinetobacter seifertii</i>      | 0                 | 0                          | 5450              | 0.013738547                | -0.013738547            | -0.01410327  | -0.013374    | <1E-301   | <1E-301            |
| 11  | <i>Acinetobacter soli</i>           | 6031              | 0.011687265                | 18489             | 0.046607707                | -0.034920442            | -0.03565401  | -0.034187    | <1E-301   | <1E-301            |
| 12  | <i>Acinetobacter sp. ATCC 27244</i> | 0                 | 0                          | 4390              | 0.011066463                | -0.011066463            | -0.0113938   | -0.010739    | <1E-301   | <1E-301            |
| 13  | <i>Acinetobacter sp. LMB-5</i>      | 0                 | 0                          | 5734              | 0.014454464                | -0.014454464            | -0.01482857  | -0.01408     | <1E-301   | <1E-301            |
| 14  | <i>Acinetobacter sp. NIPH 542</i>   | 0                 | 0                          | 4210              | 0.010612713                | -0.010612713            | -0.01093327  | -0.010292    | <1E-301   | <1E-301            |
| 15  | <i>Acinetobacter sp. P8-3-8</i>     | 10295             | 0.019950322                | 18669             | 0.047061457                | -0.027111135            | -0.02788831  | -0.026334    | <1E-301   | <1E-301            |
| 16  | <i>Acinetobacter sp. WC-136</i>     | 0                 | 0                          | 5631              | 0.014194818                | -0.014194818            | -0.01456555  | -0.013824    | <1E-301   | <1E-301            |
| 17  | <i>Acinetobacter sp. WC-141</i>     | 6233              | 0.012078714                | 7940              | 0.020015425                | -0.007936711            | -0.00846934  | -0.007404    | 1.45E-197 | 3.26E-197          |
| 18  | <i>Acinetobacter ursingii</i>       | 0                 | 0                          | 4185              | 0.010549692                | -0.010549692            | -0.0108693   | -0.01023     | <1E-301   | <1E-301            |
| 19  | <i>Bacillus anthracis</i>           | 63791             | 0.123618358                | 0                 | 0                          | 0.123618358             | 0.122659658  | 0.1245771    | <1E-301   | <1E-301            |
| 20  | <i>Bacillus cereus</i>              | 40565             | 0.078609501                | 0                 | 0                          | 0.078609501             | 0.077844827  | 0.0793742    | <1E-301   | <1E-301            |
| 21  | <i>Bacillus thuringiensis</i>       | 6076              | 0.011774469                | 0                 | 0                          | 0.011774469             | 0.011478426  | 0.0120705    | <1E-301   | <1E-301            |
| 22  | <i>Bradyrhizobium sp. DFCI-1</i>    | 0                 | 0                          | 5932              | 0.01495359                 | -0.01495359             | -0.01533409  | -0.014573    | <1E-301   | <1E-301            |

| S/N | Bacterial species                                         | FEN_Res no. Reads | FEN_Res Rel. abundance (%) | FEN_Sus no. reads | FEN_Sus Rel. abundance (%) | Diff. Rel abundance (%) | 95% lower CI | 95% upper CI | p-values  | Corrected p-values |
|-----|-----------------------------------------------------------|-------------------|----------------------------|-------------------|----------------------------|-------------------------|--------------|--------------|-----------|--------------------|
| 23  | <i>Citrobacter freundii</i>                               | 15605             | 0.030240386                | 15671             | 0.039503996                | -0.009263609            | -0.01004299  | -0.008484    | 3.84E-123 | 8.12E-123          |
| 24  | <i>Citrobacter koseri</i>                                 | 24288             | 0.04706687                 | 28707             | 0.072365593                | -0.025298723            | -0.02632365  | -0.024274    | <1E-301   | <1E-301            |
| 25  | <i>Citrobacter sp. 30_2</i>                               | 9886              | 0.019157735                | 9666              | 0.024366385                | -0.00520865             | -0.00582386  | -0.004593    | 3.08E-63  | 5.84E-63           |
| 26  | <i>Citrobacter sp. BIDMC107</i>                           | 13541             | 0.026240632                | 7679              | 0.019357487                | 0.006883145             | 0.006264513  | 0.0075018    | 4.67E-103 | 9.60E-103          |
| 27  | <i>Citrobacter sp. BIDMC108</i>                           | 8311              | 0.016105598                | 0                 | 0                          | 0.016105598             | 0.015759369  | 0.0164518    | <1E-301   | <1E-301            |
| 28  | <i>Citrobacter sp. MGH99</i>                              | 5978              | 0.011584558                | 0                 | 0                          | 0.011584558             | 0.011290912  | 0.0118782    | <1E-301   | <1E-301            |
| 29  | <i>Citrobacter youngae</i>                                | 10713             | 0.02076035                 | 8713              | 0.02196403                 | -0.00120368             | -0.00180962  | -0.000598    | 9.57E-05  | 0.0001381          |
| 30  | <i>Cronobacter sakazakii</i>                              | 23829             | 0.046177389                | 19382             | 0.048858812                | -0.002681423            | -0.00358503  | -0.001778    | 5.56E-09  | 8.73E-09           |
| 31  | <i>Edwardsiella ictaluri</i>                              | 13954             | 0.027040971                | 6608              | 0.016657674                | 0.010383297             | 0.009781196  | 0.0109854    | 1.98E-242 | 4.75E-242          |
| 32  | <i>Enterobacter asburiae</i>                              | 147290            | 0.285428163                | 547968            | 1.381336574                | -1.095908411            | -1.09982126  | -1.091996    | <1E-301   | <1E-301            |
| 33  | <i>Enterobacter cancerogenus</i>                          | 16645             | 0.032255766                | 64670             | 0.163022359                | -0.130766593            | -0.13211423  | -0.129419    | <1E-301   | <1E-301            |
| 34  | <i>Enterobacter cloacae</i>                               | 1422587           | 2.756781816                | 6358155           | 16.02785572                | -13.27107391            | -13.2833331  | -13.25881    | <1E-301   | <1E-301            |
| 35  | <i>Enterobacter cloacae complex 'Hoffmann cluster IV'</i> | 38588             | 0.074778342                | 114397            | 0.288375891                | -0.213597549            | -0.21542532  | -0.21177     | <1E-301   | <1E-301            |
| 36  | <i>Enterobacter cloacae complex sp. GN04787</i>           | 7479              | 0.014493294                | 45530             | 0.114773589                | -0.100280296            | -0.10138394  | -0.099177    | <1E-301   | <1E-301            |
| 37  | <i>Enterobacter cloacae complex sp. GN06232</i>           | 0                 | 0                          | 7942              | 0.020020467                | -0.020020467            | -0.02046073  | -0.01958     | <1E-301   | <1E-301            |
| 38  | <i>Enterobacter hormaechei</i>                            | 148495            | 0.28776329                 | 265151            | 0.668401757                | -0.380638467            | -0.38356513  | -0.377712    | <1E-301   | <1E-301            |
| 39  | <i>Enterobacter kobei</i>                                 | 9103              | 0.017640387                | 48732             | 0.122845301                | -0.105204914            | -0.10635358  | -0.104056    | <1E-301   | <1E-301            |
| 40  | <i>Enterobacter ludwigii</i>                              | 0                 | 0                          | 13678             | 0.034479973                | -0.034479973            | -0.03505771  | -0.033902    | <1E-301   | <1E-301            |
| 41  | <i>Enterobacter mori</i>                                  | 0                 | 0                          | 22744             | 0.057333857                | -0.057333857            | -0.05807876  | -0.056589    | <1E-301   | <1E-301            |
| 42  | <i>Enterobacter sp. 35669</i>                             | 19734             | 0.038241832                | 114220            | 0.287929703                | -0.249687871            | -0.25143852  | -0.247937    | <1E-301   | <1E-301            |
| 43  | <i>Enterobacter sp. 35699</i>                             | 0                 | 0                          | 6858              | 0.017287882                | -0.017287882            | -0.017697    | -0.016879    | <1E-301   | <1E-301            |
| 44  | <i>Enterobacter sp. 50588862</i>                          | 10746             | 0.020824299                | 72147             | 0.181870638                | -0.161046339            | -0.16242944  | -0.159663    | <1E-301   | <1E-301            |
| 45  | <i>Enterobacter sp. 50858885</i>                          | 0                 | 0                          | 5498              | 0.013859547                | -0.013859547            | -0.01422587  | -0.013493    | <1E-301   | <1E-301            |
| 46  | <i>Enterobacter sp. 638</i>                               | 7004              | 0.013572808                | 13689             | 0.034507702                | -0.020934894            | -0.02159449  | -0.020275    | <1E-301   | <1E-301            |
| 47  | <i>Enterobacter sp. BIDMC 29</i>                          | 13222             | 0.025622453                | 74261             | 0.187199682                | -0.161577229            | -0.16299147  | -0.160163    | <1E-301   | <1E-301            |
| 48  | <i>Enterobacter sp. BIDMC92</i>                           | 0                 | 0                          | 8212              | 0.020701092                | -0.020701092            | -0.02114878  | -0.020253    | <1E-301   | <1E-301            |
| 49  | <i>Enterobacter sp. DC1</i>                               | 0                 | 0                          | 24267             | 0.061173088                | -0.061173088            | -0.06194252  | -0.060404    | <1E-301   | <1E-301            |
| 50  | <i>Enterobacter sp. DC3</i>                               | 0                 | 0                          | 11154             | 0.028117387                | -0.028117387            | -0.02863912  | -0.027596    | <1E-301   | <1E-301            |

| S/N | Bacterial species                      | FEN_Res no. Reads | FEN_Res Rel. abundance (%) | FEN_Sus no. reads | FEN_Sus Rel. abundance (%) | Diff. Rel abundance (%) | 95% lower CI | 95% upper CI | p-values  | Corrected p-values |
|-----|----------------------------------------|-------------------|----------------------------|-------------------|----------------------------|-------------------------|--------------|--------------|-----------|--------------------|
| 51  | <i>Enterobacter sp. EGD-HP1</i>        | 12555             | 0.024329897                | 50840             | 0.12815922                 | -0.103829323            | -0.10502118  | -0.102637    | <1E-301   | <1E-301            |
| 52  | <i>Enterobacter sp. FY-07</i>          | 47291             | 0.091643582                | 44552             | 0.112308213                | -0.020664631            | -0.02199426  | -0.019335    | 1.03E-207 | 2.34E-207          |
| 53  | <i>Enterobacter sp. GN02283</i>        | 0                 | 0                          | 26007             | 0.06555934                 | -0.06555934             | -0.06635586  | -0.064763    | <1E-301   | <1E-301            |
| 54  | <i>Enterobacter sp. GN02548</i>        | 0                 | 0                          | 22104             | 0.055720523                | -0.055720523            | -0.05645488  | -0.054986    | <1E-301   | <1E-301            |
| 55  | <i>Enterobacter sp. GN03164</i>        | 0                 | 0                          | 4104              | 0.010345504                | -0.010345504            | -0.010662    | -0.010029    | <1E-301   | <1E-301            |
| 56  | <i>Enterobacter sp. MGH 14</i>         | 0                 | 0                          | 4314              | 0.01087488                 | -0.01087488             | -0.01119938  | -0.01055     | <1E-301   | <1E-301            |
| 57  | <i>Enterobacter sp. MGH 23</i>         | 0                 | 0                          | 6458              | 0.016279548                | -0.016279548            | -0.01667656  | -0.015883    | <1E-301   | <1E-301            |
| 58  | <i>Enterobacter sp. MGH 24</i>         | 0                 | 0                          | 4040              | 0.010184171                | -0.010184171            | -0.01049819  | -0.00987     | <1E-301   | <1E-301            |
| 59  | <i>Enterobacter sp. MGH 25</i>         | 0                 | 0                          | 4075              | 0.0102724                  | -0.0102724              | -0.01058778  | -0.009957    | <1E-301   | <1E-301            |
| 60  | <i>Enterobacter sp. MT20</i>           | 0                 | 0                          | 11705             | 0.029506366                | -0.029506366            | -0.03004082  | -0.028972    | <1E-301   | <1E-301            |
| 61  | <i>Enterobacter sp. SENG-6</i>         | 0                 | 0                          | 4420              | 0.011142088                | -0.011142088            | -0.01147055  | -0.010814    | <1E-301   | <1E-301            |
| 62  | <i>Enterobacter sp. T1-1</i>           | 0                 | 0                          | 7825              | 0.019725529                | -0.019725529            | -0.02016254  | -0.019289    | <1E-301   | <1E-301            |
| 63  | <i>Enterobacter sp. UCD-UG_FMILLET</i> | 0                 | 0                          | 22395             | 0.056454086                | -0.056454086            | -0.05719326  | -0.055715    | <1E-301   | <1E-301            |
| 64  | <i>Enterobacter xiangfangensis</i>     | 0                 | 0                          | 12777             | 0.032208701                | -0.032208701            | -0.03276709  | -0.03165     | <1E-301   | <1E-301            |
| 65  | <i>Erwinia sp. 9145</i>                | 8431              | 0.016338141                | 5394              | 0.013597381                | 0.002740761             | 0.002237511  | 0.003244     | 3.19E-26  | 5.52E-26           |
| 66  | <i>Escherichia coli</i>                | 1142366           | 2.213751297                | 717662            | 1.809107044                | 0.404644253             | 0.398872188  | 0.4104163    | <1E-301   | <1E-301            |
| 67  | <i>Halomonas titanicae</i>             | 5770              | 0.011181482                | 0                 | 0                          | 0.011181482             | 0.010892989  | 0.01147      | <1E-301   | <1E-301            |
| 68  | <i>Klebsiella michiganensis</i>        | 50408             | 0.097683908                | 30699             | 0.077387095                | 0.020296813             | 0.019082201  | 0.0215114    | 4.38E-231 | 1.04E-230          |
| 69  | <i>Klebsiella oxytoca</i>              | 137884            | 0.267200603                | 79836             | 0.201253334                | 0.065947269             | 0.063965165  | 0.0679294    | <1E-301   | <1E-301            |
| 70  | <i>Klebsiella pneumoniae</i>           | 38277478          | 74.17659188                | 19799625          | 49.91157543                | 24.26501645             | 24.24540306  | 24.28463     | <1E-301   | <1E-301            |
| 71  | <i>Klebsiella quasipneumoniae</i>      | 44095             | 0.085450165                | 18985             | 0.047858041                | 0.037592124             | 0.036543894  | 0.0386404    | <1E-301   | <1E-301            |
| 72  | <i>Klebsiella sp. 1_1_55</i>           | 65858             | 0.127623925                | 36301             | 0.091508809                | 0.036115116             | 0.034760797  | 0.0374694    | <1E-301   | <1E-301            |
| 73  | <i>Klebsiella sp. 10982</i>            | 12667             | 0.024546938                | 6055              | 0.015263652                | 0.009283286             | 0.008708417  | 0.0098582    | 5.93E-213 | 1.36E-212          |
| 74  | <i>Klebsiella sp. 4_1_44FAA</i>        | 20764             | 0.040237833                | 11057             | 0.027872866                | 0.012364967             | 0.011610476  | 0.0131195    | 1.66E-220 | 3.85E-220          |
| 75  | <i>Klebsiella sp. AS10</i>             | 7265              | 0.014078591                | 4816              | 0.012140338                | 0.001938252             | 0.001466724  | 0.0024098    | 1.19E-15  | 1.93E-15           |
| 76  | <i>Klebsiella sp. KTE92</i>            | 6488              | 0.012572869                | 4086              | 0.010300129                | 0.00227274              | 0.001833062  | 0.0027124    | 9.85E-24  | 1.64E-23           |
| 77  | <i>Klebsiella sp. MS 92-3</i>          | 332044            | 0.643456507                | 185449            | 0.467486215                | 0.175970291             | 0.172926439  | 0.1790141    | <1E-301   | <1E-301            |
| 78  | <i>Klebsiella sp. OBRC7</i>            | 16823             | 0.032600706                | 6134              | 0.015462798                | 0.017137908             | 0.016511552  | 0.0177643    | <1E-301   | <1E-301            |
| 79  | <i>Klebsiella variicola</i>            | 120054            | 0.232648467                | 67184             | 0.169359737                | 0.06328873              | 0.061454307  | 0.0651232    | <1E-301   | <1E-301            |
| 80  | <i>Kluyvera cryocrescens</i>           | 11908             | 0.023076099                | 10169             | 0.025634365                | -0.002558266            | -0.00320628  | -0.00191     | 7.52E-15  | 1.21E-14           |

| S/N | Bacterial species                                           | FEN_Res no. Reads | FEN_Res Rel. abundance (%) | FEN_Sus no. reads | FEN_Sus Rel. abundance (%) | Diff. Rel abundance (%) | 95% lower CI | 95% upper CI | p-values   | Corrected p-values |
|-----|-------------------------------------------------------------|-------------------|----------------------------|-------------------|----------------------------|-------------------------|--------------|--------------|------------|--------------------|
| 81  | <i>Kosakonia radicincitans</i>                              | 23526             | 0.045590216                | 15693             | 0.039559454                | 0.006030762             | 0.005180963  | 0.0068806    | 1.76E-43   | 3.26E-43           |
| 82  | <i>Leclercia adecarboxylata</i>                             | 6678              | 0.012941064                | 16178             | 0.040782059                | -0.027840995            | -0.02854177  | -0.02714     | <1E-301    | <1E-301            |
| 83  | <i>Lelliottia amnigena</i>                                  | 0                 | 0                          | 15489             | 0.039045204                | -0.039045204            | -0.03965998  | -0.03843     | <1E-301    | <1E-301            |
| 84  | <i>Microbacterium sp. SUBG005</i>                           | 0                 | 0                          | 6665              | 0.016801361                | -0.016801361            | -0.01720469  | -0.016398    | <1E-301    | <1E-301            |
| 85  | <i>Morganella morganii</i>                                  | 7522              | 0.014576622                | 6009              | 0.015147694                | -0.000571072            | -0.0010762   | -6.59E-05    | 0.02642035 | 0.0362241          |
| 86  | <i>Pantoea sp. FF5</i>                                      | 8214              | 0.015917625                | 0                 | 0                          | 0.015917625             | 0.015573422  | 0.0162618    | <1E-301    | <1E-301            |
| 87  | <i>Pectobacterium carotovorum</i>                           | 5958              | 0.011545801                | 5575              | 0.014053652                | -0.002507851            | -0.00297903  | -0.002037    | 6.40E-26   | 1.09E-25           |
| 88  | <i>Photobacterium sp. SKA34</i>                             | 7116              | 0.013789849                | 4479              | 0.011290817                | 0.002499031             | 0.002038635  | 0.0029594    | 5.24E-26   | 8.99E-26           |
| 89  | <i>Photorhabdus luminescens</i>                             | 11191             | 0.021686649                | 6552              | 0.016516507                | 0.005170142             | 0.004603292  | 0.005737     | 5.32E-70   | 1.03E-69           |
| 90  | <i>Pluralibacter gergoviae</i>                              | 22694             | 0.043977912                | 12853             | 0.032400284                | 0.011577628             | 0.010777072  | 0.0123782    | 8.95E-173  | 1.97E-172          |
| 91  | <i>Providencia stuartii</i>                                 | 7474              | 0.014483604                | 5220              | 0.013158755                | 0.001324849             | 0.000839862  | 0.0018098    | 9.93E-08   | 1.51E-07           |
| 92  | <i>Rahnella aquatilis</i>                                   | 33019             | 0.06398637                 | 18039             | 0.045473331                | 0.018513039             | 0.01755587   | 0.0194702    | 9.65E-307  | 2.36E-306          |
| 93  | <i>Raoultella ornithinolytica</i>                           | 40011             | 0.077535924                | 23055             | 0.058117837                | 0.019418087             | 0.018350747  | 0.0204854    | 1.62E-272  | 3.93E-272          |
| 94  | <i>Raoultella planticola</i>                                | 7691              | 0.014904121                | 4418              | 0.011137046                | 0.003767075             | 0.003299348  | 0.0042348    | 6.25E-55   | 1.17E-54           |
| 95  | <i>Salmonella enterica</i>                                  | 378341            | 0.733173851                | 281584            | 0.709826628                | 0.023347223             | 0.019848245  | 0.0268462    | 5.66E-39   | 1.03E-38           |
| 96  | <i>Serratia marcescens</i>                                  | 15447             | 0.029934203                | 30610             | 0.07716274                 | -0.047228537            | -0.04821312  | -0.046244    | <1E-301    | <1E-301            |
| 97  | <i>Shigella boydii</i>                                      | 0                 | 0                          | 4062              | 0.010239629                | -0.010239629            | -0.01055451  | -0.009925    | <1E-301    | <1E-301            |
| 98  | <i>Shigella dysenteriae</i>                                 | 7057              | 0.013675515                | 5893              | 0.014855277                | -0.001179762            | -0.00167537  | -0.000684    | 2.86E-06   | 4.24E-06           |
| 99  | <i>Shigella flexneri</i>                                    | 12842             | 0.024886065                | 9757              | 0.024595781                | 0.000290284             | -0.00036035  | 0.0009409    | 0.38301959 | 0.5030016          |
| 100 | <i>Shigella sonnei</i>                                      | 23842             | 0.046202582                | 16459             | 0.041490413                | 0.004712169             | 0.003848805  | 0.0055755    | 1.81E-26   | 3.16E-26           |
| 101 | <i>Stenotrophomonas maltophilia</i>                         | 0                 | 0                          | 4859              | 0.012248734                | -0.012248734            | -0.01259312  | -0.011904    | <1E-301    | <1E-301            |
| 102 | <i>Xenorhabdus cabanillasii</i>                             | 7157              | 0.013869301                | 6129              | 0.015450194                | -0.001580893            | -0.00208371  | -0.001078    | 6.07E-10   | 9.58E-10           |
| 103 | <i>Yokenella regensburgei</i>                               | 13422             | 0.026010026                | 11025             | 0.027792199                | -0.001782173            | -0.00246234  | -0.001102    | 2.62E-07   | 3.94E-07           |
| 104 | <i>uncultured beta proteobacterium CBNPD1 BAC clone 578</i> | 8263              | 0.01601258                 | 5320              | 0.013410839                | 0.002601741             | 0.002102711  | 0.0031008    | 3.61E-24   | 6.06E-24           |
| 105 | Unclassified Acinetobacter                                  | 1144506           | 2.217898328                | 1274406           | 3.21256646                 | -0.994668132            | -1.00146919  | -0.987867    | <1E-301    | <1E-301            |
| 106 | Unclassified Actinobacteria                                 | 11020             | 0.021355274                | 1805              | 0.004550106                | 0.016805168             | 0.016354614  | 0.0172557    | <1E-301    | <1E-301            |
| 107 | Unclassified Actinobacteria                                 | 413               | 0.000800338                | 31                | 7.81E-05                   | 0.000722192             | 0.00064025   | 0.0008041    | 3.44E-66   | 6.57E-66           |
| 108 | Unclassified Alphaproteobacteria                            | 3094              | 0.005995755                | 2473              | 0.006234023                | -0.000238269            | -0.0005623   | 8.58E-05     | 0.15184486 | 0.2030808          |

| S/N | Bacterial species                | FEN_Res no. Reads | FEN_Res Rel. abundance (%) | FEN_Sus no. reads | FEN_Sus Rel. abundance (%) | Diff. Rel abundance (%) | 95% lower CI | 95% upper CI | p-values   | Corrected p-values |
|-----|----------------------------------|-------------------|----------------------------|-------------------|----------------------------|-------------------------|--------------|--------------|------------|--------------------|
| 109 | Unclassified Bacillaceae         | 558               | 0.001081329                | 0                 | 0                          | 0.001081329             | 0.000991609  | 0.001171     | 9.72E-139  | 2.10E-138          |
| 110 | Unclassified Bacillales          | 1110              | 0.00215103                 | 1361              | 0.003430856                | -0.001279825            | -0.00150171  | -0.001058    | 5.36E-31   | 9.51E-31           |
| 111 | Unclassified Bacilli             | 2698              | 0.00522836                 | 134               | 0.000337792                | 0.004890568             | 0.004685166  | 0.005096     | <1E-301    | <1E-301            |
| 112 | Unclassified Bacillus            | 124807            | 0.24185914                 | 0                 | 0                          | 0.24185914              | 0.240518953  | 0.2431993    | <1E-301    | <1E-301            |
| 113 | Unclassified Bacteroidetes       | 5888              | 0.01141015                 | 386               | 0.000973042                | 0.010437108             | 0.010129939  | 0.0107443    | <1E-301    | <1E-301            |
| 114 | Unclassified Betaproteobacteria  | 738               | 0.001430145                | 602               | 0.001517542                | -8.74E-05               | -0.00024659  | 7.18E-05     | 0.28262625 | 0.3734092          |
| 115 | Unclassified Bradyrhizobiaceae   | 281               | 0.00054454                 | 329               | 0.000829355                | -0.000284814            | -0.00039475  | -0.000175    | 2.42E-07   | 3.66E-07           |
| 116 | Unclassified Bradyrhizobium      | 13940             | 0.027013841                | 11349             | 0.028608949                | -0.001595109            | -0.00228649  | -0.000904    | 5.91E-06   | 8.70E-06           |
| 117 | Unclassified Burkholderiales     | 5567              | 0.010788095                | 4399              | 0.01108915                 | -0.000301055            | -0.00073427  | 0.0001322    | 0.17255564 | 0.2293727          |
| 118 | Unclassified Cedecea             | 6042              | 0.011708581                | 5632              | 0.014197339                | -0.002488758            | -0.00296269  | -0.002015    | 3.05E-25   | 5.15E-25           |
| 119 | Unclassified Citrobacter         | 28689             | 0.055595414                | 39078             | 0.098509166                | -0.042913752            | -0.04408278  | -0.041745    | <1E-301    | <1E-301            |
| 120 | Unclassified Cronobacter         | 3138              | 0.006081021                | 2604              | 0.006564253                | -0.000483232            | -0.00081312  | -0.000153    | 0.00403345 | 0.0057097          |
| 121 | Unclassified Edwardsiella        | 4052              | 0.00785223                 | 2816              | 0.00709867                 | 0.00075356              | 0.000396929  | 0.0011102    | 3.88E-05   | 5.63E-05           |
| 122 | Unclassified Enterobacter        | 969964            | 1.879659464                | 2702083           | 6.811503727                | -4.931844263            | -4.94051589  | -4.923173    | <1E-301    | <1E-301            |
| 123 | Unclassified Enterobacteriaceae  | 2016336           | 3.90738733                 | 1692643           | 4.266872669                | -0.359485339            | -0.3677016   | -0.351269    | <1E-301    | <1E-301            |
| 124 | Unclassified Enterobacteriales   | 1                 | 1.94E-06                   | 0                 | 0                          | 1.94E-06                | -1.86E-06    | 5.74E-06     | 0.99999995 | 1.2674418          |
| 125 | Unclassified Erwinia             | 7685              | 0.014892494                | 4863              | 0.012258818                | 0.002633676             | 0.00215457   | 0.0031128    | 1.16E-26   | 2.04E-26           |
| 126 | Unclassified Escherichia         | 12931             | 0.025058535                | 14688             | 0.037026015                | -0.011967481            | -0.01270566  | -0.011229    | 2.00E-230  | 4.68E-230          |
| 127 | Unclassified Firmicutes          | 4159              | 0.008059581                | 2258              | 0.005692044                | 0.002367537             | 0.00202826   | 0.0027068    | 1.72E-41   | 3.15E-41           |
| 128 | Unclassified Flavobacteriaceae   | 0                 | 0                          | 4210              | 0.010612713                | -0.010612713            | -0.01093327  | -0.010292    | <1E-301    | <1E-301            |
| 129 | Unclassified Flavobacteriales    | 0                 | 0                          | 1                 | 2.52E-06                   | -2.52E-06               | -7.46E-06    | 2.42E-06     | 0.4346256  | 0.5673556          |
| 130 | Unclassified Gammaproteobacteria | 70864             | 0.137324878                | 48595             | 0.122499947                | 0.014824932             | 0.013339781  | 0.0163101    | 1.92E-84   | 3.76E-84           |
| 131 | Unclassified Haemophilus         | 8778              | 0.017010581                | 4674              | 0.01178238                 | 0.005228201             | 0.004737596  | 0.0057188    | 2.40E-94   | 4.81E-94           |
| 132 | Unclassified Halomonadaceae      | 8                 | 1.55E-05                   | 0                 | 0                          | 1.55E-05                | 4.76E-06     | 2.62E-05     | 0.01171299 | 0.0163682          |
| 133 | Unclassified Halomonas           | 48                | 9.30E-05                   | 0                 | 0                          | 9.30E-05                | 6.67E-05     | 0.0001193    | 1.47E-12   | 2.35E-12           |
| 134 | Unclassified Intrasporangiaceae  | 5570              | 0.010793909                | 0                 | 0                          | 0.010793909             | 0.010510459  | 0.0110774    | <1E-301    | <1E-301            |
| 135 | Unclassified Klebsiella          | 782408            | 1.516201221                | 464850            | 1.171809862                | 0.344391359             | 0.339665867  | 0.3491169    | <1E-301    | <1E-301            |
| 136 | Unclassified Kluyvera            | 6477              | 0.012551553                | 5253              | 0.013241943                | -0.00069039             | -0.00116118  | -0.00022     | 0.00400136 | 0.0057013          |
| 137 | Unclassified Kosakonia           | 1641              | 0.003180037                | 2525              | 0.006365107                | -0.00318507             | -0.00347714  | -0.002893    | 2.74E-109  | 5.75E-109          |
| 138 | Unclassified Lactobacillales     | 5957              | 0.011543863                | 4075              | 0.0102724                  | 0.001271463             | 0.000840894  | 0.001702     | 8.82E-09   | 1.37E-08           |

| S/N | Bacterial species              | FEN_Res no. Reads | FEN_Res Rel. abundance (%) | FEN_Sus no. reads | FEN_Sus Rel. abundance (%) | Diff. Rel abundance (%) | 95% lower CI | 95% upper CI | p-values   | Corrected p-values |
|-----|--------------------------------|-------------------|----------------------------|-------------------|----------------------------|-------------------------|--------------|--------------|------------|--------------------|
| 139 | Unclassified Leclercia         | 63                | 0.000122086                | 429               | 0.001081438                | -0.000959352            | -0.00106603  | -0.000853    | 5.37E-91   | 1.06E-90           |
| 140 | Unclassified Microbacteriaceae | 0                 | 0                          | 27                | 6.81E-05                   | -6.81E-05               | -9.37E-05    | -4.24E-05    | 1.69E-10   | 2.70E-10           |
| 141 | Unclassified Microbacterium    | 0                 | 0                          | 20                | 5.04E-05                   | -5.04E-05               | -7.25E-05    | -2.83E-05    | 5.79E-08   | 8.88E-08           |
| 142 | Unclassified Micrococcales     | 8081              | 0.015659889                | 275               | 0.000693229                | 0.014966659             | 0.01461556   | 0.0153178    | <1E-301    | <1E-301            |
| 143 | Unclassified Moraxellaceae     | 2015              | 0.003904798                | 2532              | 0.006382753                | -0.002477954            | -0.0027794   | -0.002177    | 2.49E-61   | 4.69E-61           |
| 144 | Unclassified Morganella        | 7                 | 1.36E-05                   | 3                 | 7.56E-06                   | 6.00E-06                | -7.20E-06    | 1.92E-05     | 0.52949883 | 0.6830222          |
| 145 | Unclassified Oceanospirillales | 324               | 0.000627868                | 0                 | 0                          | 0.000627868             | 0.000559502  | 0.0006962    | 7.13E-81   | 1.39E-80           |
| 146 | Unclassified Pantoea           | 92809             | 0.17985133                 | 39616             | 0.099865375                | 0.079985955             | 0.078468541  | 0.0815034    | <1E-301    | <1E-301            |
| 147 | Unclassified Pasteurellaceae   | 9735              | 0.018865118                | 7012              | 0.017676091                | 0.001189027             | 0.000630861  | 0.0017472    | 3.25E-05   | 4.76E-05           |
| 148 | Unclassified Pectobacterium    | 4858              | 0.009414149                | 3284              | 0.00827842                 | 0.001135729             | 0.000748129  | 0.0015233    | 1.18E-08   | 1.82E-08           |
| 149 | Unclassified Photobacterium    | 1006              | 0.001949492                | 400               | 0.001008334                | 0.000941159             | 0.00078535   | 0.001097     | 5.21E-31   | 9.32E-31           |
| 150 | Unclassified Photorhabdus      | 514               | 0.000996063                | 494               | 0.001245292                | -0.000249229            | -0.00038878  | -0.00011     | 0.00041683 | 0.0005978          |
| 151 | Unclassified Pluralibacter     | 8                 | 1.55E-05                   | 0                 | 0                          | 1.55E-05                | 4.76E-06     | 2.62E-05     | 0.01171299 | 0.0164738          |
| 152 | Unclassified Proteobacteria    | 11275             | 0.02184943                 | 8876              | 0.022374926                | -0.000525496            | -0.00114132  | 9.03E-05     | 0.09492099 | 0.1285266          |
| 153 | Unclassified Providencia       | 6632              | 0.012851922                | 3318              | 0.008364128                | 0.004487793             | 0.004067497  | 0.0049081    | 2.12E-94   | 4.28E-94           |
| 154 | Unclassified Pseudomonadaceae  | 25                | 4.84E-05                   | 19                | 4.79E-05                   | 5.51E-07                | -2.82E-05    | 2.93E-05     | 1.00000036 | 1.0000004          |
| 155 | Unclassified Pseudomonadales   | 497               | 0.000963119                | 386               | 0.000973042                | -9.92E-06               | -0.00013873  | 0.0001189    | 0.89201761 | 1.137192           |
| 156 | Unclassified Pseudomonas       | 19005             | 0.036829128                | 11030             | 0.027804803                | 0.009024325             | 0.008287275  | 0.0097614    | 1.37E-124  | 2.93E-124          |
| 157 | Unclassified Rahnella          | 431               | 0.00083522                 | 338               | 0.000852042                | -1.68E-05               | -0.00013711  | 0.0001035    | 0.79905416 | 1.0246695          |
| 158 | Unclassified Raoultella        | 5564              | 0.010782282                | 2553              | 0.00643569                 | 0.004346592             | 0.003969002  | 0.0047242    | 5.32E-109  | 1.10E-108          |
| 159 | Unclassified Rhizobiales       | 3727              | 0.007222424                | 2213              | 0.005578606                | 0.001643817             | 0.001315519  | 0.0019721    | 2.72E-22   | 4.49E-22           |
| 160 | Unclassified Salmonella        | 2255              | 0.004369886                | 3110              | 0.007839795                | -0.003469909            | -0.00379921  | -0.003141    | 1.01E-100  | 2.06E-100          |
| 161 | Unclassified Serratia          | 11439             | 0.02216724                 | 14893             | 0.037542786                | -0.015375547            | -0.01610246  | -0.014649    | <1E-301    | <1E-301            |
| 162 | Unclassified Shigella          | 6568              | 0.012727899                | 1239              | 0.003123314                | 0.009604585             | 0.009251057  | 0.0099581    | <1E-301    | <1E-301            |
| 163 | Unclassified Staphylococcaceae | 790               | 0.001530913                | 37                | 9.33E-05                   | 0.001437643             | 0.00132674   | 0.0015485    | 3.14E-145  | 6.84E-145          |
| 164 | Unclassified Staphylococcus    | 7841              | 0.015194801                | 4794              | 0.01208488                 | 0.003109921             | 0.002630225  | 0.0035896    | 2.53E-36   | 4.55E-36           |
| 165 | Unclassified Stenotrophomonas  | 0                 | 0                          | 1320              | 0.003327501                | -0.003327501            | -0.003507    | -0.003148    | <1E-301    | <1E-301            |
| 166 | Unclassified Vibrio            | 8801              | 0.017055151                | 6523              | 0.016443403                | 0.000611749             | 7.68E-05     | 0.0011467    | 0.02556166 | 0.0352686          |
| 167 | Unclassified Vibrionaceae      | 225               | 0.00043602                 | 160               | 0.000403334                | 3.27E-05                | -5.19E-05    | 0.0001173    | 0.47187469 | 0.6123136          |
| 168 | Unclassified Vibrionales       | 9                 | 1.74E-05                   | 16                | 4.03E-05                   | -2.29E-05               | -4.57E-05    | -8.01E-08    | 0.04402571 | 0.059985           |

| S/N | Bacterial species             | FEN_Res no. Reads | FEN_Res Rel. abundance (%) | FEN_Sus no. reads | FEN_Sus Rel. abundance (%) | Diff. Rel abundance (%) | 95% lower CI       | 95% upper CI     | p-values          | Corrected p-values |
|-----|-------------------------------|-------------------|----------------------------|-------------------|----------------------------|-------------------------|--------------------|------------------|-------------------|--------------------|
| 169 | Unclassified Xanthomonadaceae | 0                 | 0                          | 1171              | 0.002951897                | -0.002951897            | -0.00312097        | -0.002783        | <1E-301           | <1E-301            |
| 170 | Unclassified Xanthomonadales  | 0                 | 0                          | 17                | 4.29E-05                   | -4.29E-05               | -6.32E-05          | -2.25E-05        | 7.05E-07          | 1.05E-06           |
| 171 | Unclassified Xenorhabdus      | 1518              | 0.002941679                | 1241              | 0.003128355                | -0.000186676            | -0.00041513        | 4.18E-05         | 0.11095129        | 0.1493048          |
| 172 | Unclassified Yersinia         | 7245              | 0.014039833                | 6455              | 0.016271986                | -0.002232153            | -0.00274406        | -0.00172         | 7.66E-18          | 1.26E-17           |
| 173 | <b>Unclassified Bacteria</b>  | <b>90033</b>      | <b>0.174471816</b>         | <b>68339</b>      | <b>0.172271301</b>         | <b>0.002200515</b>      | <b>0.000479501</b> | <b>0.0039215</b> | <b>0.01228673</b> | <b>0.0170606</b>   |
|     | <b>Total</b>                  | <b>51603177</b>   | <b>100</b>                 | <b>39669405</b>   | <b>100</b>                 |                         |                    |                  |                   |                    |

| S/N | Bacterial genera      | FEN_Res no. reads | FEN_Res Rel. abundance (%) | FEN_Sus no. reads | FEN_Sus Rel. abundance (%) | Diff. Rel abundance (%) | 95% lower CI | 95% upper CI | p-values   | Corrected p-values |
|-----|-----------------------|-------------------|----------------------------|-------------------|----------------------------|-------------------------|--------------|--------------|------------|--------------------|
| 1   | <i>Acinetobacter</i>  | 3994881           | 7.741540797                | 4725882           | 11.91316583                | -4.171625029            | -4.18406642  | -4.159184    | <1E-301    | <1E-301            |
| 2   | <i>Bacillus</i>       | 235239            | 0.455861468                | 0                 | 0                          | 0.455861468             | 0.454023516  | 0.4576994    | <1E-301    | <1E-301            |
| 3   | <i>Bradyrhizobium</i> | 13940             | 0.027013841                | 17281             | 0.043562539                | -0.016548698            | -0.01733781  | -0.01576     | <1E-301    | <1E-301            |
| 4   | <i>Cedecea</i>        | 6042              | 0.011708581                | 5632              | 0.014197339                | -0.002488758            | -0.00296269  | -0.002015    | 3.05E-25   | 6.66E-25           |
| 5   | <i>Citrobacter</i>    | 117011            | 0.226751543                | 109514            | 0.276066656                | -0.049315114            | -0.05140081  | -0.047229    | <1E-301    | <1E-301            |
| 6   | <i>Cronobacter</i>    | 26967             | 0.05225841                 | 21986             | 0.055423065                | -0.003164654            | -0.00412654  | -0.002203    | 1.03E-10   | 2.02E-10           |
| 7   | <i>Edwardsiella</i>   | 18006             | 0.0348932                  | 9424              | 0.023756343                | 0.011136857             | 0.010437103  | 0.0118366    | 7.82E-208  | 2.94E-207          |
| 8   | <i>Enterobacter</i>   | 2870703           | 5.563035392                | 10746972          | 27.09133651                | -21.52830112            | -21.5434794  | -21.51312    | <1E-301    | <1E-301            |
| 9   | <i>Erwinia</i>        | 16116             | 0.031230635                | 10257             | 0.025856198                | 0.005374437             | 0.004679647  | 0.0060692    | 3.80E-51   | 9.65E-51           |
| 10  | <i>Escherichia</i>    | 1155297           | 2.238809831                | 732350            | 1.846133059                | 0.392676772             | 0.386859521  | 0.398494     | <1E-301    | <1E-301            |
| 11  | <i>Haemophilus</i>    | 8778              | 0.017010581                | 4674              | 0.01178238                 | 0.005228201             | 0.004737596  | 0.0057188    | 2.40E-94   | 7.53E-94           |
| 12  | <i>Halomonas</i>      | 5818              | 0.0112745                  | 0                 | 0                          | 0.0112745               | 0.010984809  | 0.0115642    | <1E-301    | <1E-301            |
| 13  | <i>Klebsiella</i>     | 40029326          | 77.57143712                | 20796121          | 52.42357681                | 25.14786031             | 25.12859794  | 25.167123    | <1E-301    | <1E-301            |
| 14  | <i>Kluyvera</i>       | 18385             | 0.035627651                | 15422             | 0.038876308                | -0.003248656            | -0.00404956  | -0.002448    | 1.47E-15   | 2.95E-15           |
| 15  | <i>Kosakonia</i>      | 25167             | 0.048770253                | 18218             | 0.045924561                | 0.002845692             | 0.001947141  | 0.0037442    | 5.99E-10   | 1.10E-09           |
| 16  | <i>Leclercia</i>      | 6741              | 0.013063149                | 16607             | 0.041863497                | -0.028800347            | -0.02950919  | -0.028092    | <1E-301    | <1E-301            |
| 17  | <i>Lelliottia</i>     | 0                 | 0                          | 15489             | 0.039045204                | -0.039045204            | -0.03965998  | -0.03843     | <1E-301    | <1E-301            |
| 18  | <i>Microbacterium</i> | 0                 | 0                          | 6685              | 0.016851778                | -0.016851778            | -0.01725571  | -0.016448    | <1E-301    | <1E-301            |
| 19  | <i>Morganella</i>     | 7529              | 0.014590187                | 6012              | 0.015155256                | -0.000565069            | -0.00107037  | -5.98E-05    | 0.02829376 | 0.042897           |

| S/N | Bacterial species                                           | FEN_Res no. Reads | FEN_Res Rel. abundance (%) | FEN_Sus no. reads | FEN_Sus Rel. abundance (%) | Diff. Rel abundance (%) | 95% lower CI | 95% upper CI | p-values   | Corrected p-values |
|-----|-------------------------------------------------------------|-------------------|----------------------------|-------------------|----------------------------|-------------------------|--------------|--------------|------------|--------------------|
| 20  | <i>Pantoea</i>                                              | 101023            | 0.195768954                | 39616             | 0.099865375                | 0.095903579             | 0.094347753  | 0.0974594    | <1E-301    | <1E-301            |
| 21  | <i>Pectobacterium</i>                                       | 10816             | 0.02095995                 | 8859              | 0.022332072                | -0.001372122            | -0.00198221  | -0.000762    | 1.01E-05   | 1.66E-05           |
| 22  | <i>Photobacterium</i>                                       | 8122              | 0.015739341                | 4879              | 0.012299151                | 0.00344019              | 0.00295415   | 0.0039262    | 6.02E-43   | 1.49E-42           |
| 23  | <i>Photorhabdus</i>                                         | 11705             | 0.022682712                | 7046              | 0.017761799                | 0.004920913             | 0.004337144  | 0.0055047    | 3.75E-60   | 9.78E-60           |
| 24  | <i>Pluralibacter</i>                                        | 22702             | 0.043993415                | 12853             | 0.032400284                | 0.011593131             | 0.010792503  | 0.0123938    | 3.40E-173  | 1.23E-172          |
| 25  | <i>Providencia</i>                                          | 14106             | 0.027335526                | 8538              | 0.021522884                | 0.005812642             | 0.005170916  | 0.0064544    | 3.26E-69   | 9.28E-69           |
| 26  | <i>Pseudomonas</i>                                          | 19005             | 0.036829128                | 11030             | 0.027804803                | 0.009024325             | 0.008287275  | 0.0097614    | 1.37E-124  | 4.44E-124          |
| 27  | <i>Rahnella</i>                                             | 33450             | 0.06482159                 | 18377             | 0.046325373                | 0.018496217             | 0.017531527  | 0.0194609    | 1.54E-301  | 6.04E-301          |
| 28  | <i>Raoultella</i>                                           | 53266             | 0.103222327                | 30026             | 0.075690573                | 0.027531754             | 0.026306998  | 0.0287565    | <1E-301    | <1E-301            |
| 29  | <i>Salmonella</i>                                           | 380596            | 0.737543737                | 284694            | 0.717666423                | 0.019877314             | 0.016363096  | 0.0233915    | 1.70E-28   | 3.82E-28           |
| 30  | <i>Serratia</i>                                             | 26886             | 0.052101443                | 45503             | 0.114705527                | -0.062604084            | -0.06382766  | -0.061381    | <1E-301    | <1E-301            |
| 31  | <i>Shigella</i>                                             | 50309             | 0.097492059                | 37410             | 0.094304414                | 0.003187645             | 0.001908037  | 0.0044673    | 1.10E-06   | 1.85E-06           |
| 32  | <i>Staphylococcus</i>                                       | 7841              | 0.015194801                | 4794              | 0.01208488                 | 0.003109921             | 0.002630225  | 0.0035896    | 2.53E-36   | 5.94E-36           |
| 33  | <i>Stenotrophomonas</i>                                     | 0                 | 0                          | 6179              | 0.015576236                | -0.015576236            | -0.01596458  | -0.015188    | <1E-301    | <1E-301            |
| 34  | <i>Vibrio</i>                                               | 8801              | 0.017055151                | 6523              | 0.016443403                | 0.000611749             | 7.68E-05     | 0.0011467    | 0.02556166 | 0.0393901          |
| 35  | <i>Xenorhabdus</i>                                          | 8675              | 0.01681098                 | 7370              | 0.018578549                | -0.001767569            | -0.00231984  | -0.001215    | 2.97E-10   | 5.58E-10           |
| 36  | <i>Yersinia</i>                                             | 7245              | 0.014039833                | 6455              | 0.016271986                | -0.002232153            | -0.00274406  | -0.00172     | 7.66E-18   | 1.56E-17           |
| 37  | <i>Yokenella</i>                                            | 13422             | 0.026010026                | 11025             | 0.027792199                | -0.001782173            | -0.00246234  | -0.001102    | 2.62E-07   | 4.56E-07           |
| 38  | <i>Uncultured beta proteobacterium CBNPD1 BAC clone 578</i> | 8263              | 0.01601258                 | 5320              | 0.013410839                | 0.002601741             | 0.002102711  | 0.0031008    | 3.61E-24   | 7.72E-24           |
| 39  | Unclassified Actinobacteria                                 | 11020             | 0.021355274                | 1805              | 0.004550106                | 0.016805168             | 0.016354614  | 0.0172557    | <1E-301    | <1E-301            |
| 40  | Unclassified Actinobacteria                                 | 413               | 0.000800338                | 31                | 7.81E-05                   | 0.000722192             | 0.00064025   | 0.0008041    | 3.44E-66   | 9.50E-66           |
| 41  | Unclassified Alphaproteobacteria                            | 3094              | 0.005995755                | 2473              | 0.006234023                | -0.000238269            | -0.0005623   | 8.58E-05     | 0.15184486 | 0.219591           |
| 42  | Unclassified Bacillaceae                                    | 558               | 0.001081329                | 0                 | 0                          | 0.001081329             | 0.000991609  | 0.001171     | 9.72E-139  | 3.26E-138          |
| 43  | Unclassified Bacillales                                     | 1110              | 0.00215103                 | 1361              | 0.003430856                | -0.001279825            | -0.00150171  | -0.001058    | 5.36E-31   | 1.23E-30           |
| 44  | Unclassified Bacilli                                        | 2698              | 0.00522836                 | 134               | 0.000337792                | 0.004890568             | 0.004685166  | 0.005096     | <1E-301    | <1E-301            |
| 45  | Unclassified Bacteroidetes                                  | 5888              | 0.01141015                 | 386               | 0.000973042                | 0.010437108             | 0.010129939  | 0.0107443    | <1E-301    | <1E-301            |
| 46  | Unclassified Betaproteobacteria                             | 738               | 0.001430145                | 602               | 0.001517542                | -8.74E-05               | -0.00024659  | 7.18E-05     | 0.28262625 | 0.3965204          |
| 47  | Unclassified Bradyrhizobiaceae                              | 281               | 0.00054454                 | 329               | 0.000829355                | -0.000284814            | -0.00039475  | -0.000175    | 2.42E-07   | 4.29E-07           |



| S/N | Bacterial species                | FEN_Res no. Reads | FEN_Res Rel. abundance (%) | FEN_Sus no. reads | FEN_Sus Rel. abundance (%) | Diff. Rel abundance (%) | 95% lower CI       | 95% upper CI     | p-values          | Corrected p-values |
|-----|----------------------------------|-------------------|----------------------------|-------------------|----------------------------|-------------------------|--------------------|------------------|-------------------|--------------------|
| 48  | Unclassified Burkholderiales     | 5567              | 0.010788095                | 4399              | 0.01108915                 | -0.000301055            | -0.00073427        | 0.0001322        | 0.17255564        | 0.2457611          |
| 49  | Unclassified Enterobacteriaceae  | 2016336           | 3.90738733                 | 1692643           | 4.266872669                | -0.359485339            | -0.3677016         | -0.351269        | <1E-301           | <1E-301            |
| 50  | Unclassified Enterobacteriales   | 1                 | 1.94E-06                   | 0                 | 0                          | 1.94E-06                | -1.86E-06          | 5.74E-06         | 0.99999995        | 1.3239436          |
| 51  | Unclassified Firmicutes          | 4159              | 0.008059581                | 2258              | 0.005692044                | 0.002367537             | 0.00202826         | 0.0027068        | 1.72E-41          | 4.15E-41           |
| 52  | Unclassified Flavobacteriaceae   | 0                 | 0                          | 4210              | 0.010612713                | -0.010612713            | -0.01093327        | -0.010292        | <1E-301           | <1E-301            |
| 53  | Unclassified Flavobacteriales    | 0                 | 0                          | 1                 | 2.52E-06                   | -2.52E-06               | -7.46E-06          | 2.42E-06         | 0.4346256         | 0.600806           |
| 54  | Unclassified Gammaproteobacteria | 70864             | 0.137324878                | 48595             | 0.122499947                | 0.014824932             | 0.013339781        | 0.0163101        | 1.92E-84          | 5.81E-84           |
| 55  | Unclassified Halomonadaceae      | 8                 | 1.55E-05                   | 0                 | 0                          | 1.55E-05                | 4.76E-06           | 2.62E-05         | 0.01171299        | 0.0186614          |
| 56  | Unclassified Intrasporangiaceae  | 5570              | 0.010793909                | 0                 | 0                          | 0.010793909             | 0.010510459        | 0.0110774        | <1E-301           | <1E-301            |
| 57  | Unclassified Lactobacillales     | 5957              | 0.011543863                | 4075              | 0.0102724                  | 0.001271463             | 0.000840894        | 0.001702         | 8.82E-09          | 1.59E-08           |
| 58  | Unclassified Microbacteriaceae   | 0                 | 0                          | 27                | 6.81E-05                   | -6.81E-05               | -9.37E-05          | -4.24E-05        | 1.69E-10          | 3.25E-10           |
| 59  | Unclassified Micrococcales       | 8081              | 0.015659889                | 275               | 0.000693229                | 0.014966659             | 0.01461556         | 0.0153178        | <1E-301           | <1E-301            |
| 60  | Unclassified Moraxellaceae       | 2015              | 0.003904798                | 2532              | 0.006382753                | -0.002477954            | -0.0027794         | -0.002177        | 2.49E-61          | 6.70E-61           |
| 61  | Unclassified Oceanospirillales   | 324               | 0.000627868                | 0                 | 0                          | 0.000627868             | 0.000559502        | 0.0006962        | 7.13E-81          | 2.09E-80           |
| 62  | Unclassified Pasteurellaceae     | 9735              | 0.018865118                | 7012              | 0.017676091                | 0.001189027             | 0.000630861        | 0.0017472        | 3.25E-05          | 5.27E-05           |
| 63  | Unclassified Proteobacteria      | 11275             | 0.02184943                 | 8876              | 0.022374926                | -0.000525496            | -0.00114132        | 9.03E-05         | 0.09492099        | 0.1394152          |
| 64  | Unclassified Pseudomonadaceae    | 25                | 4.84E-05                   | 19                | 4.79E-05                   | 5.51E-07                | -2.82E-05          | 2.93E-05         | 1.00000036        | 1.0000004          |
| 65  | Unclassified Pseudomonadales     | 497               | 0.000963119                | 386               | 0.000973042                | -9.92E-06               | -0.00013873        | 0.0001189        | 0.89201761        | 1.1978522          |
| 66  | Unclassified Rhizobiales         | 3727              | 0.007222424                | 2213              | 0.005578606                | 0.001643817             | 0.001315519        | 0.0019721        | 2.72E-22          | 5.68E-22           |
| 67  | Unclassified Staphylococcaceae   | 790               | 0.001530913                | 37                | 9.33E-05                   | 0.001437643             | 0.00132674         | 0.0015485        | 3.14E-145         | 1.09E-144          |
| 68  | Unclassified Vibrionaceae        | 225               | 0.00043602                 | 160               | 0.000403334                | 3.27E-05                | -5.19E-05          | 0.0001173        | 0.47187469        | 0.6428438          |
| 69  | Unclassified Vibrionales         | 9                 | 1.74E-05                   | 16                | 4.03E-05                   | -2.29E-05               | -4.57E-05          | -8.01E-08        | 0.04402571        | 0.0656892          |
| 70  | Unclassified Xanthomonadaceae    | 0                 | 0                          | 1171              | 0.002951897                | -0.002951897            | -0.00312097        | -0.002783        | <1E-301           | <1E-301            |
| 71  | Unclassified Xanthomonadales     | 0                 | 0                          | 17                | 4.29E-05                   | -4.29E-05               | -6.32E-05          | -2.25E-05        | 7.05E-07          | 1.20E-06           |
| 72  | <b>Unclassified Bacteria</b>     | <b>90033</b>      | <b>0.174471816</b>         | <b>68339</b>      | <b>0.172271301</b>         | <b>0.002200515</b>      | <b>0.000479501</b> | <b>0.0039215</b> | <b>0.01228673</b> | <b>0.0192492</b>   |
|     | <b>Total</b>                     | <b>51603177</b>   | <b>100</b>                 | <b>39669405</b>   | <b>100</b>                 |                         |                    |                  |                   |                    |

| S/N | Bacterial species                | FEN_Res no. Reads | FEN_Res Rel. abundance (%) | FEN_Sus no. reads | FEN_Sus Rel. abundance (%) | Diff. Rel abundance (%) | 95% lower CI | 95% upper CI | p-values   | Corrected p-values |
|-----|----------------------------------|-------------------|----------------------------|-------------------|----------------------------|-------------------------|--------------|--------------|------------|--------------------|
| S/N | Bacterial family                 | FE_Res no. Reads  | FEN_Res Rel abundance (%)  | FEN_Sus no. Reads | FEN_Res Re. abundance (%)  | Diff. Rel abundance (%) | 95% lower CI | 95% upper CI | p-values   | Corrected p-values |
| 1   | Bacillaceae                      | 235797            | 0.456942796                | 0                 | 0                          | 0.456942796             | 0.455102676  | 0.4587829    | <1E-301    | <1E-301            |
| 2   | Bradyrhizobiaceae                | 14221             | 0.027558381                | 17610             | 0.044391893                | -0.016833513            | -0.01763024  | -0.016037    | <1E-301    | <1E-301            |
| 3   | Enterobacteriaceae               | 47047827          | 91.17234584                | 34714419          | 87.50930093                | 3.663044909             | 3.650170062  | 3.6759198    | <1E-301    | <1E-301            |
| 4   | Flavobacteriaceae                | 0                 | 0                          | 4210              | 0.010612713                | -0.010612713            | -0.01093327  | -0.010292    | <1E-301    | <1E-301            |
| 5   | Halomonadaceae                   | 5826              | 0.011290003                | 0                 | 0                          | 0.011290003             | 0.011000113  | 0.0115799    | <1E-301    | <1E-301            |
| 6   | Intrasporangiaceae               | 5570              | 0.010793909                | 0                 | 0                          | 0.010793909             | 0.010510459  | 0.0110774    | <1E-301    | <1E-301            |
| 7   | Microbacteriaceae                | 0                 | 0                          | 6712              | 0.01691984                 | -0.01691984             | -0.01732459  | -0.016515    | <1E-301    | <1E-301            |
| 8   | Moraxellaceae                    | 3996896           | 7.745445595                | 4728414           | 11.91954858                | -4.174102984            | -4.18654726  | -4.161659    | <1E-301    | <1E-301            |
| 9   | Pasteurellaceae                  | 18513             | 0.035875698                | 11686             | 0.029458471                | 0.006417228             | 0.005674157  | 0.0071603    | 2.87E-63   | 7.41E-63           |
| 10  | Pseudomonadaceae                 | 19030             | 0.036877574                | 11049             | 0.027852699                | 0.009024875             | 0.008287267  | 0.0097625    | 2.07E-124  | 7.24E-124          |
| 11  | Staphylococcaceae                | 8631              | 0.016725714                | 4831              | 0.012178151                | 0.004547563             | 0.004055218  | 0.0050399    | 1.55E-71   | 4.48E-71           |
| 12  | Vibrionaceae                     | 17148             | 0.033230512                | 11562             | 0.029145887                | 0.004084625             | 0.003356991  | 0.0048123    | 7.35E-28   | 1.64E-27           |
| 13  | Xanthomonadaceae                 | 0                 | 0                          | 7350              | 0.018528133                | -0.018528133            | -0.01895167  | -0.018105    | <1E-301    | <1E-301            |
|     | Uncultured beta proteobacterium  |                   |                            |                   |                            |                         |              |              |            |                    |
| 14  | CBNPD1 BAC clone 578             | 8263              | 0.01601258                 | 5320              | 0.013410839                | 0.002601741             | 0.002102711  | 0.0031008    | 3.61E-24   | 7.70E-24           |
| 15  | Unclassified Actinobacteria      | 11020             | 0.021355274                | 1805              | 0.004550106                | 0.016805168             | 0.016354614  | 0.0172557    | <1E-301    | <1E-301            |
| 16  | Unclassified Actinobacteria      | 413               | 0.000800338                | 31                | 7.81E-05                   | 0.000722192             | 0.00064025   | 0.0008041    | 3.44E-66   | 9.36E-66           |
| 17  | Unclassified Alphaproteobacteria | 3094              | 0.005995755                | 2473              | 0.006234023                | -0.000238269            | -0.0005623   | 8.58E-05     | 0.15184486 | 0.2480133          |
| 18  | Unclassified Bacillales          | 1110              | 0.00215103                 | 1361              | 0.003430856                | -0.001279825            | -0.00150171  | -0.001058    | 5.36E-31   | 1.25E-30           |
| 19  | Unclassified Bacilli             | 2698              | 0.00522836                 | 134               | 0.000337792                | 0.004890568             | 0.004685166  | 0.005096     | <1E-301    | <1E-301            |
| 20  | Unclassified Bacteroidetes       | 5888              | 0.01141015                 | 386               | 0.000973042                | 0.010437108             | 0.010129939  | 0.0107443    | <1E-301    | <1E-301            |
| 21  | Unclassified Betaproteobacteria  | 738               | 0.001430145                | 602               | 0.001517542                | -8.74E-05               | -0.00024659  | 7.18E-05     | 0.28262625 | 0.4327714          |
| 22  | Unclassified Burkholderiales     | 5567              | 0.010788095                | 4399              | 0.01108915                 | -0.000301055            | -0.00073427  | 0.0001322    | 0.17255564 | 0.2727492          |
| 23  | Unclassified Enterobacteriales   | 1                 | 1.94E-06                   | 0                 | 0                          | 1.94E-06                | -1.86E-06    | 5.74E-06     | 0.99999995 | 1.3999999          |
| 24  | Unclassified Firmicutes          | 4159              | 0.008059581                | 2258              | 0.005692044                | 0.002367537             | 0.00202826   | 0.0027068    | 1.72E-41   | 4.21E-41           |
| 25  | Unclassified Flavobacteriales    | 0                 | 0                          | 1                 | 2.52E-06                   | -2.52E-06               | -7.46E-06    | 2.42E-06     | 0.4346256  | 0.6453532          |

| S/N | Bacterial species                | FEN_Res no. Reads | FEN_Res Rel. abundance (%) | FEN_Sus no. reads | FEN_Sus Rel. abundance (%) | Diff. Rel abundance (%) | 95% lower CI       | 95% upper CI     | p-values          | Corrected p-values |
|-----|----------------------------------|-------------------|----------------------------|-------------------|----------------------------|-------------------------|--------------------|------------------|-------------------|--------------------|
| 26  | Unclassified Gammaproteobacteria | 70864             | 0.137324878                | 48595             | 0.122499947                | 0.014824932             | 0.013339781        | 0.0163101        | 1.92E-84          | 6.26E-84           |
| 27  | Unclassified Lactobacillales     | 5957              | 0.011543863                | 4075              | 0.0102724                  | 0.001271463             | 0.000840894        | 0.001702         | 8.82E-09          | 1.73E-08           |
| 28  | Unclassified Micrococcales       | 8081              | 0.015659889                | 275               | 0.000693229                | 0.014966659             | 0.01461556         | 0.0153178        | <1E-301           | <1E-301            |
| 29  | Unclassified Oceanospirillales   | 324               | 0.000627868                | 0                 | 0                          | 0.000627868             | 0.000559502        | 0.0006962        | 7.13E-81          | 2.18E-80           |
| 30  | Unclassified Proteobacteria      | 11275             | 0.02184943                 | 8876              | 0.022374926                | -0.000525496            | -0.00114132        | 9.03E-05         | 0.09492099        | 0.1603837          |
| 31  | Unclassified Pseudomonadales     | 497               | 0.000963119                | 386               | 0.000973042                | -9.92E-06               | -0.00013873        | 0.0001189        | 0.89201761        | 1.2855548          |
| 32  | Unclassified Rhizobiales         | 3727              | 0.007222424                | 2213              | 0.005578606                | 0.001643817             | 0.001315519        | 0.0019721        | 2.72E-22          | 5.55E-22           |
| 33  | Unclassified Vibrionales         | 9                 | 1.74E-05                   | 16                | 4.03E-05                   | -2.29E-05               | -4.57E-05          | -8.01E-08        | 0.04402571        | 0.077045           |
| 34  | Unclassified Xanthomonadales     | 0                 | 0                          | 17                | 4.29E-05                   | -4.29E-05               | -6.32E-05          | -2.25E-05        | 7.05E-07          | 1.33E-06           |
| 35  | <b>Unclassified Bacteria</b>     | <b>90033</b>      | <b>0.174471816</b>         | <b>68339</b>      | <b>0.172271301</b>         | <b>0.002200515</b>      | <b>0.000479501</b> | <b>0.0039215</b> | <b>0.01228673</b> | <b>0.0222981</b>   |
|     | <b>Total</b>                     | <b>51603177</b>   | <b>100</b>                 | <b>39669405</b>   | <b>100</b>                 |                         |                    |                  |                   |                    |

| S/N | Bacterial order   | FEN_Res no. Reads | FEN_Res Rel. abundance (%) | FEN_Sus no. Reads | FEN_SusL Rel. abundance (%) | Diff. Rel abundance (%) | 95% lower CI | 95% upper CI | p-values   | Corrected p-values |
|-----|-------------------|-------------------|----------------------------|-------------------|-----------------------------|-------------------------|--------------|--------------|------------|--------------------|
| 1   | Bacillales        | 245538            | 0.475819541                | 6192              | 0.015609006                 | 0.460210535             | 0.458293145  | 0.4621279    | <1E-301    | <1E-301            |
| 2   | Burkholderiales   | 5567              | 0.010788095                | 4399              | 0.01108915                  | -0.000301055            | -0.00073427  | 0.0001322    | 0.17255564 | 0.2353031          |
| 3   | Enterobacteriales | 47047828          | 91.17234778                | 34714419          | 87.50930093                 | 3.663046847             | 3.650172     | 3.6759217    | <1E-301    | <1E-301            |
| 4   | Flavobacteriales  | 0                 | 0                          | 4211              | 0.010615234                 | -0.010615234            | -0.01093583  | -0.010295    | <1E-301    | <1E-301            |
| 5   | Lactobacillales   | 5957              | 0.011543863                | 4075              | 0.0102724                   | 0.001271463             | 0.000840894  | 0.001702     | 8.82E-09   | 1.47E-08           |
| 6   | Micrococcales     | 13651             | 0.026453798                | 6987              | 0.01761307                  | 0.008840728             | 0.008234588  | 0.0094469    | 1.05E-174  | 2.87E-174          |
| 7   | Oceanospirillales | 6150              | 0.011917871                | 0                 | 0                           | 0.011917871             | 0.011620031  | 0.0122157    | <1E-301    | <1E-301            |
| 8   | Pasteurellales    | 18513             | 0.035875698                | 11686             | 0.029458471                 | 0.006417228             | 0.005674157  | 0.0071603    | 2.87E-63   | 6.16E-63           |
| 9   | Pseudomonadales   | 4016423           | 7.783286289                | 4739849           | 11.94837432                 | -4.165088031            | -4.17755039  | -4.152626    | <1E-301    | <1E-301            |
| 10  | Rhizobiales       | 17948             | 0.034780804                | 19823             | 0.0499705                   | -0.015189696            | -0.01605137  | -0.014328    | 3.56E-271  | 1.07E-270          |
| 11  | Vibrionales       | 17157             | 0.033247953                | 11578             | 0.02918622                  | 0.004061732             | 0.003333742  | 0.0047897    | 1.59E-27   | 2.98E-27           |
| 12  | Xanthomonadales   | 0                 | 0                          | 7367              | 0.018570987                 | -0.018570987            | -0.01899502  | -0.018147    | <1E-301    | <1E-301            |

| S/N | Bacterial species                                    | FEN_Res no. Reads | FEN_Res Rel. abundance (%) | FEN_Sus no. reads | FEN_Sus Rel. abundance (%) | Diff. Rel abundance (%) | 95% lower CI       | 95% upper CI     | p-values          | Corrected p-values |
|-----|------------------------------------------------------|-------------------|----------------------------|-------------------|----------------------------|-------------------------|--------------------|------------------|-------------------|--------------------|
| 13  | Uncultured beta proteobacterium CBNPD1 BAC clone 578 | 8263              | 0.01601258                 | 5320              | 0.013410839                | 0.002601741             | 0.002102711        | 0.0031008        | 3.61E-24          | 6.38E-24           |
| 14  | Unclassified Actinobacteria                          | 11020             | 0.021355274                | 1805              | 0.004550106                | 0.016805168             | 0.016354614        | 0.0172557        | <1E-301           | <1E-301            |
| 15  | Unclassified Actinobacteria                          | 413               | 0.000800338                | 31                | 7.81E-05                   | 0.000722192             | 0.00064025         | 0.0008041        | 3.44E-66          | 7.93E-66           |
| 16  | Unclassified Alphaproteobacteria                     | 3094              | 0.005995755                | 2473              | 0.006234023                | -0.000238269            | -0.0005623         | 8.58E-05         | 0.15184486        | 0.2169212          |
| 17  | Unclassified Bacilli                                 | 2698              | 0.00522836                 | 134               | 0.000337792                | 0.004890568             | 0.004685166        | 0.005096         | <1E-301           | <1E-301            |
| 18  | Unclassified Bacteroidetes                           | 5888              | 0.01141015                 | 386               | 0.000973042                | 0.010437108             | 0.010129939        | 0.0107443        | <1E-301           | <1E-301            |
| 19  | Unclassified Betaproteobacteria                      | 738               | 0.001430145                | 602               | 0.001517542                | -8.74E-05               | -0.00024659        | 7.18E-05         | 0.28262625        | 0.3686429          |
| 20  | Unclassified Firmicutes                              | 4159              | 0.008059581                | 2258              | 0.005692044                | 0.002367537             | 0.00202826         | 0.0027068        | 1.72E-41          | 3.44E-41           |
| 21  | Unclassified Gammaproteobacteria                     | 70864             | 0.137324878                | 48595             | 0.122499947                | 0.014824932             | 0.013339781        | 0.0163101        | 1.92E-84          | 4.79E-84           |
| 22  | Unclassified Proteobacteria                          | 11275             | 0.02184943                 | 8876              | 0.022374926                | -0.000525496            | -0.00114132        | 9.03E-05         | 0.09492099        | 0.1423815          |
| 23  | <b>Unclassified Bacteria</b>                         | <b>90033</b>      | <b>0.174471816</b>         | <b>68339</b>      | <b>0.172271301</b>         | <b>0.002200515</b>      | <b>0.000479501</b> | <b>0.0039215</b> | <b>0.01228673</b> | <b>0.0194001</b>   |
|     | <b>Total</b>                                         | <b>51603177</b>   | <b>100</b>                 | <b>39669405</b>   | <b>100</b>                 |                         |                    |                  |                   |                    |

| S/N | Bacterial Class             | FEN_Res no. reads | FEN_Res Rel. abundance (%) | FEN_Sus no. reads | FEN_Sus Rel. abundance (%) | Diff. Rel abundance (%) | 95% lower CI | 95% upper CI | p-values   | Corrected p-values |
|-----|-----------------------------|-------------------|----------------------------|-------------------|----------------------------|-------------------------|--------------|--------------|------------|--------------------|
| 1   | Actinobacteria              | 24671             | 0.047809072                | 8792              | 0.022163176                | 0.025645896             | 0.024890711  | 0.0264011    | <1E-301    | <1E-301            |
| 2   | Alphaproteobacteria         | 21042             | 0.040776559                | 22296             | 0.056204523                | -0.015427964            | -0.0163485   | -0.014507    | 3.55E-244  | 7.70E-244          |
| 3   | Bacilli                     | 254193            | 0.492591764                | 10401             | 0.026219198                | 0.466372566             | 0.464397032  | 0.4683481    | <1E-301    | <1E-301            |
| 4   | Betaproteobacteria          | 14568             | 0.02823082                 | 10321             | 0.026017532                | 0.002213288             | 0.001533599  | 0.002893     | 2.06E-10   | 2.97E-10           |
| 5   | Flavobacteriia              | 0                 | 0                          | 4211              | 0.010615234                | -0.010615234            | -0.01093583  | -0.010295    | <1E-301    | <1E-301            |
| 6   | Gammaproteobacteria         | 51176935          | 99.17400047                | 39533494          | 99.65739088                | -0.483390409            | -0.48645708  | -0.480324    | <1E-301    | <1E-301            |
| 7   | Unclassified Actinobacteria | 413               | 0.000800338                | 31                | 7.81E-05                   | 0.000722192             | 0.00064025   | 0.0008041    | 3.44E-66   | 6.38E-66           |
| 8   | Unclassified Bacteroidetes  | 5888              | 0.01141015                 | 386               | 0.000973042                | 0.010437108             | 0.010129939  | 0.0107443    | <1E-301    | <1E-301            |
| 9   | Unclassified Firmicutes     | 4159              | 0.008059581                | 2258              | 0.005692044                | 0.002367537             | 0.00202826   | 0.0027068    | 1.72E-41   | 2.80E-41           |
| 10  | Unclassified Proteobacteria | 11275             | 0.02184943                 | 8876              | 0.022374926                | -0.000525496            | -0.00114132  | 9.03E-05     | 0.09492099 | 0.1121793          |

| S/N | Bacterial species     | FEN_Res no. Reads | FEN_Res Rel. abundance (%) | FEN_Sus no. reads | FEN_Sus Rel. abundance (%) | Diff. Rel abundance (%) | 95% lower CI | 95% upper CI | p-values   | Corrected p-values |
|-----|-----------------------|-------------------|----------------------------|-------------------|----------------------------|-------------------------|--------------|--------------|------------|--------------------|
| 11  | Unclassified Bacteria | 90033             | 0.174471816                | 68339             | 0.172271301                | 0.002200515             | 0.000479501  | 0.0039215    | 0.01228673 | 0.0159728          |
|     | <b>Total</b>          | <b>51603177</b>   | <b>100</b>                 | <b>39669405</b>   | <b>100</b>                 |                         |              |              |            |                    |

| S/N | Bacterial Phylum      | FEN_Res no. reads | FEN_Res Rel. abundance (%) | FEN_Sus no. reads | FEN_Sus Rel. abundance (%) | Diff. Rel abundance (%) | 95% lower CI | 95% upper CI | p-values   | Corrected p-values |
|-----|-----------------------|-------------------|----------------------------|-------------------|----------------------------|-------------------------|--------------|--------------|------------|--------------------|
| 1   | Firmicutes            | 258352            | 0.500651346                | 12659             | 0.031911242                | 0.468740103             | 0.466735802  | 0.4707444    | <1E-301    | <1E-301            |
| 2   | Actinobacteria        | 25084             | 0.04860941                 | 8823              | 0.022241322                | 0.026368088             | 0.025608474  | 0.0271277    | <1E-301    | <1E-301            |
| 3   | Bacteroidetes         | 5888              | 0.01141015                 | 4597              | 0.011588276                | -0.000178125            | -0.00062212  | 0.0002659    | 0.43066824 | 0.4306682          |
| 4   | Proteobacteria        | 51223820          | 99.26485728                | 39574987          | 99.76198786                | -0.497130581            | -0.49991117  | -0.49435     | <1E-301    | <1E-301            |
| 5   | Unclassified Bacteria | 90033             | 0.174471816                | 68339             | 0.172271301                | 0.002200515             | 0.000479501  | 0.0039215    | 0.01228673 | 0.0153584          |
|     | <b>Total</b>          | <b>51603177</b>   | <b>100</b>                 | <b>39669405</b>   | <b>100</b>                 |                         |              |              |            |                    |

**Supplementary Table 2: Relative abundances of all enzyme classes detected in FEN\_Res and FEN\_Sus.**

| S/N                    | Bacterial xenobiotic degradation enzymes                  | FEN_Res Rel. abundance (%) | FEN_Sus Rel. abundance (%) | Diff. bw Rel. abundance | 95% lower CI | 95% upper CI | p-values | Corrected p-values |
|------------------------|-----------------------------------------------------------|----------------------------|----------------------------|-------------------------|--------------|--------------|----------|--------------------|
| <b>Oxidoreductases</b> |                                                           |                            |                            |                         |              |              |          |                    |
| 1                      | K00244 fumarate reductase flavoprotein subunit            | 4.91088366                 | 5.385051888                | -0.47417                | -0.575095543 | -0.373240909 | 2.12E-20 | 1.06E-19           |
| 2                      | K04072 acetaldehyde dehydrogenase / alcohol dehydrogenase | 2.64296336                 | 3.140879523                | -0.49792                | -0.574740468 | -0.421091852 | 9.23E-38 | 1.00E-36           |

| S/N | Bacterial species                                                         | FEN_Res no. Reads | FEN_Res Rel. abundance (%) | FEN_Sus no. reads | FEN_Sus Rel. abundance (%) | Diff. Rel abundance (%) | 95% lower CI | 95% upper CI | p-values | Corrected p-values |
|-----|---------------------------------------------------------------------------|-------------------|----------------------------|-------------------|----------------------------|-------------------------|--------------|--------------|----------|--------------------|
| 3   | K00121 S-(hydroxymethyl)glutathione dehydrogenase / alcohol dehydrogenase | 2.6377302         | 2.795918171                | -0.15819          | -0.232337847               | -0.084038086            | 2.74E-05     | 5.31E-05     |          |                    |
| 4   | K00074 3-hydroxybutyryl-CoA dehydrogenase                                 | 2.5487665         | 2.462498277                | 0.086268          | 0.015285701                | 0.157250747             | 0.017686561  | 0.0252665    |          |                    |
| 5   | K00239 succinate dehydrogenase / fumarate reductase, flavoprotein subunit | 2.42447897        | 2.751034724                | -0.32656          | -0.399194669               | -0.253916831            | 6.88E-19     | 3.20E-18     |          |                    |
| 41  | K03863 vanillate O-demethylase ferredoxin subunit                         | 2.32897382        | 2.137734476                | 0.191239          | 0.124292878                | 0.258185812             | 2.66E-08     | 6.92E-08     |          |                    |
| 6   | K00088 IMP dehydrogenase                                                  | 1.82026715        | 2.494878478                | -0.67461          | -0.741640212               | -0.607582438            | 3.06E-90     | 1.33E-88     |          |                    |
| 7   | K00146 phenylacetaldehyde dehydrogenase                                   | 1.72367176        | 1.546555356                | 0.177116          | 0.119722018                | 0.234510788             | 1.96E-09     | 5.80E-09     |          |                    |
| 8   | K00481 p-hydroxybenzoate 3-monooxygenase                                  | 1.53898485        | 1.05732578                 | 0.481659          | 0.431085964                | 0.532232185             | 1.45E-74     | 3.77E-73     |          |                    |
| 9   | K05549 benzoate/toluate 1,2-dioxygenase alpha subunit                     | 1.45329188        | 1.615162911                | -0.16187          | -0.218055167               | -0.105686905            | 1.31E-08     | 3.48E-08     |          |                    |
| 10  | K00245 fumarate reductase iron-sulfur subunit                             | 1.37501254        | 1.259301293                | 0.115711          | 0.064065563                | 0.167356927             | 1.30E-05     | 2.61E-05     |          |                    |
| 11  | K10680 N-ethylmaleimide reductase                                         | 1.28822932        | 1.449735348                | -0.16151          | -0.214653915               | -0.108358147            | 2.01E-09     | 5.81E-09     |          |                    |
| 12  | K03862 vanillate O-demethylase monooxygenase subunit                      | 1.19795732        | 1.334641365                | -0.13668          | -0.187803172               | -0.085564911            | 1.37E-07     | 3.30E-07     |          |                    |
| 13  | K00449 protocatechuate 3,4-dioxygenase, beta subunit                      | 0.9652998         | 0.906966232                | 0.058334          | 0.014657455                | 0.102009671             | 0.009447966  | 0.0144498    |          |                    |
| 14  | K00055 aryl-alcohol dehydrogenase                                         | 0.94218668        | 0.92331663                 | 0.01887           | -0.024814957               | 0.062555048             | 0.405318079  | 0.4503534    |          |                    |

| S/N | Bacterial species                                                            | FEN_Res no. Reads | FEN_Res Rel. abundance (%) | FEN_Sus no. reads | FEN_Sus Rel. abundance (%) | Diff. Rel abundance (%) | 95% lower CI | 95% upper CI | p-values | Corrected p-values |
|-----|------------------------------------------------------------------------------|-------------------|----------------------------|-------------------|----------------------------|-------------------------|--------------|--------------|----------|--------------------|
| 15  | K05784 benzoate/toluatoe 1,2-dioxygenase reductase subunit                   | 0.89879507        | 0.970764846                | -0.07197          | -0.1159019                 | -0.028037662            | 0.001283209  | 0.0020852    |          |                    |
| 16  | K00001 alcohol dehydrogenase                                                 | 0.88636631        | 0.831626159                | 0.05474           | 0.012888777                | 0.096591529             | 0.010922916  | 0.0163216    |          |                    |
| 17  | K03381 catechol 1,2-dioxygenase                                              | 0.88505802        | 0.970764846                | -0.08571          | -0.129510132               | -0.041903514            | 0.000116189  | 0.0002041    |          |                    |
| 18  | K10679 nitroreductase / dihydropteridine reductase                           | 0.87524585        | 1.029113328                | -0.15387          | -0.198376781               | -0.109358176            | 7.75E-12     | 2.40E-11     |          |                    |
| 19  | K10678 nitroreductase                                                        | 0.87262927        | 0.790910461                | 0.081719          | 0.040598212                | 0.122839407             | 0.000110248  | 0.0001963    |          |                    |
| 20  | K13953 alcohol dehydrogenase, propanol-preferring                            | 0.80677869        | 0.889974641                | -0.0832           | -0.125108057               | -0.041283854            | 9.02E-05     | 0.0001651    |          |                    |
| 21  | K00247 fumarate reductase subunit D                                          | 0.74986808        | 0.662351444                | 0.087517          | 0.049652175                | 0.125381099             | 7.03E-06     | 1.43E-05     |          |                    |
| 22  | K05783 dihydroxycyclohexadiene carboxylate dehydrogenase                     | 0.74441687        | 0.670045749                | 0.074371          | 0.036442648                | 0.112299601             | 0.000142415  | 0.0002469    |          |                    |
| 23  | K00448 protocatechuate 3,4-dioxygenase, alpha subunit                        | 0.72980764        | 0.8120698                  | -0.08226          | -0.122247547               | -0.042276778            | 5.02E-05     | 9.46E-05     |          |                    |
| 24  | K00240 succinate dehydrogenase / fumarate reductase, iron-sulfur subunit     | 0.64237027        | 1.037128229                | -0.39476          | -0.437168369               | -0.352347544            | 2.29E-79     | 7.44E-78     |          |                    |
| 25  | K00246 fumarate reductase subunit C                                          | 0.62361812        | 0.518724412                | 0.104894          | 0.070913943                | 0.13887347              | 2.33E-09     | 6.58E-09     |          |                    |
| 26  | K05550 benzoate/toluatoe 1,2-dioxygenase beta subunit                        | 0.51633836        | 0.582843623                | -0.06651          | -0.100326636               | -0.032683892            | 0.000102585  | 0.0001852    |          |                    |
| 27  | K00242 succinate dehydrogenase / fumarate reductase, membrane anchor subunit | 0.49954864        | 0.629971243                | -0.13042          | -0.164879837               | -0.095965368            | 5.32E-14     | 1.87E-13     |          |                    |

| S/N                 | Bacterial species                                                                | FEN_Res no. Reads | FEN_Res Rel. abundance (%) | FEN_Sus no. reads | FEN_Sus Rel. abundance (%) | Diff. Rel abundance (%) | 95% lower CI | 95% upper CI | p-values | Corrected p-values |
|---------------------|----------------------------------------------------------------------------------|-------------------|----------------------------|-------------------|----------------------------|-------------------------|--------------|--------------|----------|--------------------|
| 28                  | K00241 succinate dehydrogenase / fumarate reductase, cytochrome b subunit        | 0.41232932        | 0.579637662                | -0.16731          | -0.199768645               | -0.134848034            | 4.98E-25     | 2.94E-24     |          |                    |
| 29                  | K00257 Unclassified oxidoreductase                                               | 0.33165145        | 0.548219249                | -0.21657          | -0.247362914               | -0.185772676            | 2.89E-46     | 4.17E-45     |          |                    |
| 30                  | K06446 acyl-CoA dehydrogenase                                                    | 0.27561304        | 0.432484074                | -0.15687          | -0.18444908                | -0.129292983            | 1.23E-30     | 8.43E-30     |          |                    |
| 31                  | K13954 alcohol dehydrogenase                                                     | 0.22044683        | 0.316107707                | -0.09566          | -0.119584057               | -0.071737708            | 9.59E-16     | 4.15E-15     |          |                    |
| 32                  | K11731 citronellyl-CoA dehydrogenase                                             | 0.15786696        | 0.253270881                | -0.0954           | -0.116455087               | -0.074352747            | 4.07E-20     | 1.96E-19     |          |                    |
| 33                  | K00252 glutaryl-CoA dehydrogenase                                                | 0.10837           | 0.176327829                | -0.06796          | -0.08549207                | -0.050423584            | 4.13E-15     | 1.68E-14     |          |                    |
| 34                  | K00128 aldehyde dehydrogenase (NAD+)                                             | 0.10815195        | 0.150038952                | -0.04189          | -0.058470028               | -0.02530397             | 4.10E-07     | 8.87E-07     |          |                    |
| 35                  | K05599 anthranilate 1,2-dioxygenase (deaminating, decarboxylating) large subunit | 0.08416664        | 0.122788288                | -0.03862          | -0.053503705               | -0.023739588            | 2.03E-07     | 4.54E-07     |          |                    |
| 36                  | K13774 citronellol/citronellal dehydrogenase                                     | 0.08373055        | 0.117979347                | -0.03425          | -0.048918593               | -0.019579012            | 3.22E-06     | 6.64E-06     |          |                    |
| 37                  | K11311 anthranilate 1,2-dioxygenase reductase subunit                            | 0.06781302        | 0.112208618                | -0.0444           | -0.058352657               | -0.030438541            | 1.09E-10     | 3.30E-10     |          |                    |
| 38                  | K00100 Unclassified oxidoreductase                                               | 0.04208332        | 0.067645767                | -0.02556          | -0.036447683               | -0.01467721             | 2.19E-06     | 4.58E-06     |          |                    |
| 39                  | K05600 anthranilate 1,2-dioxygenase (deaminating, decarboxylating) small subunit | 0.03030871        | 0.055142521                | -0.02483          | -0.034490582               | -0.015177034            | 1.63E-07     | 3.79E-07     |          |                    |
| 40                  | K00517 Unclassified oxidoreductase                                               | 0.02420336        | 0.003205961                | 0.020997          | 0.016076364                | 0.025918436             | 2.08E-15     | 8.71E-15     |          |                    |
| <b>Transferases</b> |                                                                                  |                   |                            |                   |                            |                         |              |              |          |                    |



| S/N               | Bacterial species                                  | FEN_Res no. Reads | FEN_Res Rel. abundance (%) | FEN_Sus no. reads | FEN_Sus Rel. abundance (%) | Diff. Rel abundance (%) | 95% lower CI | 95% upper CI | p-values | Corrected p-values |
|-------------------|----------------------------------------------------|-------------------|----------------------------|-------------------|----------------------------|-------------------------|--------------|--------------|----------|--------------------|
| 1                 | K00799 glutathione S-transferase                   | 5.20895568        | 4.631009974                | 0.577946          | 0.480093279                | 0.675798133             | 1.42E-30     | 9.22E-30     |          |                    |
| 2                 | K00626 acetyl-CoA C-acetyltransferase              | 4.66623348        | 5.052914378                | -0.38668          | -0.484837279               | -0.288524523            | 8.69E-15     | 3.23E-14     |          |                    |
| 3                 | K00632 acetyl-CoA acyltransferase                  | 3.50272778        | 3.021297196                | 0.481431          | 0.401182989                | 0.561678188             | 2.24E-31     | 1.71E-30     |          |                    |
| 4                 | K00757 uridine phosphorylase                       | 1.3798096         | 1.347785803                | 0.032024          | -0.020676455               | 0.084724049             | 0.238269439  | 0.2922172    |          |                    |
| 5                 | K00758 thymidine phosphorylase                     | 1.37195986        | 1.514495751                | -0.14254          | -0.197036884               | -0.088034894            | 2.57E-07     | 5.66E-07     |          |                    |
| 6                 | K00760 hypoxanthine phosphoribosyltransferase      | 1.2014461         | 1.336885538                | -0.13544          | -0.186612751               | -0.084266132            | 1.78E-07     | 4.06E-07     |          |                    |
| 7                 | K01026 propionate CoA-transferase                  | 1.19926561        | 1.264110234                | -0.06484          | -0.115140041               | -0.0145492              | 0.011359599  | 0.0167812    |          |                    |
| 8                 | K00876 uridine kinase                              | 1.19752123        | 1.530846149                | -0.33332          | -0.386687101               | -0.279962743            | 1.52E-35     | 1.41E-34     |          |                    |
| 9                 | K01031 3-oxoadipate CoA-transferase, alpha subunit | 0.89203557        | 1.016930678                | -0.1249           | -0.169394506               | -0.080395713            | 2.86E-08     | 7.29E-08     |          |                    |
| 10                | K01032 3-oxoadipate CoA-transferase, beta subunit  | 0.78737239        | 0.948002526                | -0.16063          | -0.203183392               | -0.118076886            | 6.88E-14     | 2.35E-13     |          |                    |
| 11                | K00857 thymidine kinase                            | 0.77080072        | 0.931972724                | -0.16117          | -0.203335312               | -0.119008701            | 3.25E-14     | 1.17E-13     |          |                    |
| 12                | K00680 Unclassified transferase                    | 0.13802457        | 0.06411921                 | 0.073905          | 0.059963736                | 0.087846982             | 1.70E-23     | 9.60E-23     |          |                    |
| <b>Hydrolases</b> |                                                    |                   |                            |                   |                            |                         |              |              |          |                    |
| 1                 | K01061 carboxymethylenebutenolidase                | 4.85942427        | 3.55284545                 | 1.306579          | 1.21661968                 | 1.39653795              | 4.38E-172    | 2.85E-170    |          |                    |
| 2                 | K01053 gluconolactonase                            | 2.54331529        | 1.555852641                | 0.987463          | 0.924514515                | 1.050410789             | 4.80E-197    | 6.24E-195    |          |                    |
| 3                 | K01077 alkaline phosphatase                        | 1.90029088        | 1.474100648                | 0.42619           | 0.368309681                | 0.484070776             | 7.58E-46     | 9.86E-45     |          |                    |
| 4                 | K01093 4-phytase / acid phosphatase                | 1.67112212        | 1.315726198                | 0.355396          | 0.300848231                | 0.409943613             | 2.42E-36     | 2.42E-35     |          |                    |
| 5                 | K01489 cytidine deaminase                          | 1.05360935        | 1.010839353                | 0.04277           | -0.003116287               | 0.088656289             | 0.070211784  | 0.0931381    |          |                    |
| 6                 | K03788 acid phosphatase (class B)                  | 1.01915772        | 0.929087359                | 0.09007           | 0.045589323                | 0.134551405             | 8.10E-05     | 0.0001504    |          |                    |

| S/N | Bacterial species                  | FEN_Res no. Reads | FEN_Res Rel. abundance (%) | FEN_Sus no. reads | FEN_Sus Rel. abundance (%) | Diff. Rel abundance (%) | 95% lower CI | 95% upper CI | p-values | Corrected p-values |
|-----|------------------------------------|-------------------|----------------------------|-------------------|----------------------------|-------------------------|--------------|--------------|----------|--------------------|
| 7   | K09474 acid phosphatase (class A)  | 0.96006664        | 0.869135897                | 0.090931          | 0.047831543                | 0.134029934             | 4.10E-05     | 7.84E-05     |          |                    |
| 8   | K01428 urease subunit alpha        | 0.9386979         | 1.295208051                | -0.35651          | -0.405021554               | -0.307998742            | 4.88E-49     | 7.93E-48     |          |                    |
| 9   | K01055 3-oxoadipate enol-lactonase | 0.76992852        | 0.838358676                | -0.06843          | -0.109219552               | -0.027640754            | 0.000963722  | 0.0015859    |          |                    |
| 10  | K01512 acylphosphatase             | 0.59548989        | 0.520006797                | 0.075483          | 0.04182431                 | 0.109141875             | 1.35E-05     | 2.66E-05     |          |                    |
| 11  | K01429 urease subunit beta         | 0.45572093        | 0.41741606                 | 0.038305          | 0.008440033                | 0.068169713             | 0.012800671  | 0.0186976    |          |                    |
| 12  | K01555 fumarylacetoacetase         | 0.20801807        | 0.32155784                 | -0.11354          | -0.137385557               | -0.08969398             | 7.51E-22     | 4.07E-21     |          |                    |
| 13  | K01430 urease subunit gamma        | 0.16985962        | 0.379906322                | -0.21005          | -0.234707102               | -0.185386301            | 3.34E-70     | 7.25E-69     |          |                    |
| 14  | K01426 amidase                     | 0.1155656         | 0.162862795                | -0.0473           | -0.06452905                | -0.030065349            | 4.10E-08     | 1.02E-07     |          |                    |
| 15  | K01113 alkaline phosphatase D      | 0.0898359         | 0.14458882                 | -0.05475          | -0.070658673               | -0.038847172            | 3.16E-12     | 1.00E-11     |          |                    |
| 16  | K01457 allophanate hydrolase       | 0.04491795        | 0.05931027                 | -0.01439          | -0.024909358               | -0.003875285            | 0.006288849  | 0.0097327    |          |                    |

### Isomerases

|   |                                                    |            |             |          |              |              |             |           |  |  |
|---|----------------------------------------------------|------------|-------------|----------|--------------|--------------|-------------|-----------|--|--|
| 1 | K01856 muconate cycloisomerase                     | 1.41295294 | 1.362212626 | 0.05074  | -0.002378315 | 0.103858945  | 0.062626064 | 0.0839318 |  |  |
| 2 | K01857 3-carboxy-cis,cis-muconate cycloisomerase   | 0.70625842 | 0.7146086   | -0.00835 | -0.046575724 | 0.029875368  | 0.668267342 | 0.7120882 |  |  |
| 3 | K01826 5-carboxymethyl-2-hydroxymuconate isomerase | 0.49126281 | 0.522571565 | -0.03131 | -0.063707604 | 0.001090083  | 0.0573043   | 0.0775996 |  |  |
| 4 | K01821 4-oxalocrotonate tautomerase                | 0.33535828 | 0.336946451 | -0.00159 | -0.027923178 | 0.024746826  | 0.904249357 | 0.9480034 |  |  |
| 5 | K03464 muconolactone D-isomerase                   | 0.23331167 | 0.365479499 | -0.13217 | -0.157533846 | -0.106801805 | 6.59E-26    | 4.08E-25  |  |  |
| 6 | K01800 maleylacetoacetate isomerase                | 0.07173789 | 0.166389351 | -0.09465 | -0.110918705 | -0.07838422  | 5.96E-34    | 5.17E-33  |  |  |

### Lyases

|   |                                             |            |             |          |              |              |          |          |  |  |
|---|---------------------------------------------|------------|-------------|----------|--------------|--------------|----------|----------|--|--|
| 1 | K01607 4-carboxymuconolactone decarboxylase | 2.59412055 | 2.127154806 | 0.466966 | 0.39855145   | 0.535380029  | 6.77E-40 | 8.00E-39 |  |  |
| 2 | K01692 enoyl-CoA hydratase                  | 1.00934555 | 1.199029235 | -0.18968 | -0.237599076 | -0.141768295 | 4.44E-15 | 1.75E-14 |  |  |

| S/N                                      | Bacterial species                                                                                                   | FEN_Res no. Reads | FEN_Res Rel. abundance (%) | FEN_Sus no. reads | FEN_Sus Rel. abundance (%) | Diff. Rel abundance (%) | 95% lower CI | 95% upper CI | p-values | Corrected p-values |
|------------------------------------------|---------------------------------------------------------------------------------------------------------------------|-------------------|----------------------------|-------------------|----------------------------|-------------------------|--------------|--------------|----------|--------------------|
| 3                                        | K01666 4-hydroxy 2-oxovalerate aldolase                                                                             | 0.86630587        | 0.888371661                | -0.02207          | -0.064535926               | 0.020404344             | 0.307002888  | 0.3628216    |          |                    |
| 4                                        | K02554 2-keto-4-pentenoate hydratase                                                                                | 0.56191045        | 0.543410308                | 0.0185            | -0.015169256               | 0.052169543             | 0.287918577  | 0.3433891    |          |                    |
| 5                                        | K10218 4-hydroxy-4-methyl-2-oxoglutarate aldolase                                                                   | 0.415382          | 0.255515054                | 0.159867          | 0.134169364                | 0.185564526             | 1.71E-32     | 1.39E-31     |          |                    |
| 6                                        | K01640 hydroxymethylglutaryl-CoA lyase                                                                              | 0.03314334        | 0.037189142                | -0.00405          | -0.012621111               | 0.004529508             | 0.351215401  | 0.4113334    |          |                    |
| 7                                        | K01576 benzoylformate decarboxylase                                                                                 | 0.00872193        | 0.052257157                | -0.04354          | -0.051998621               | -0.035071829            | 5.41E-31     | 3.91E-30     |          |                    |
| <b>Ligases</b>                           |                                                                                                                     |                   |                            |                   |                            |                         |              |              |          |                    |
| 1                                        | K01951 GMP synthase (glutamine-hydrolysing)                                                                         | 2.29495829        | 2.585286565                | -0.29033          | -0.360896031               | -0.219760524            | 4.48E-16     | 2.01E-15     |          |                    |
| 2                                        | K13778 geranyl-CoA carboxylase beta subunit                                                                         | 0.15372405        | 0.210952202                | -0.05723          | -0.076921211               | -0.0375351              | 6.22E-09     | 1.68E-08     |          |                    |
| 3                                        | K13776 citronellyl-CoA synthetase                                                                                   | 0.13126507        | 0.201013725                | -0.06975          | -0.088639616               | -0.050857688            | 9.83E-14     | 3.28E-13     |          |                    |
| 4                                        | K13777 geranyl-CoA carboxylase alpha subunit                                                                        | 0.02725604        | 0.050974772                | -0.02372          | -0.032969162               | -0.014468309            | 1.61E-07     | 3.81E-07     |          |                    |
| <b>Oxidoreductases/Lyases/Isomerases</b> |                                                                                                                     |                   |                            |                   |                            |                         |              |              |          |                    |
| 1                                        | K01825 3-hydroxyacyl-CoA dehydrogenase / enoyl-CoA hydratase / 3-hydroxybutyryl-CoA epimerase / enoyl-CoA isomerase | 4.60714239        | 3.802269179                | 0.804873          | 0.714397141                | 0.895349281             | 1.38E-66     | 2.56E-65     |          |                    |
| 2                                        | K01782 3-hydroxyacyl-CoA dehydrogenase / enoyl-CoA hydratase / 3-hydroxybutyryl-CoA epimerase                       | 2.7600553         | 2.415050061                | 0.345005          | 0.273238123                | 0.416772349             | 9.18E-21     | 4.77E-20     |          |                    |

| S/N | Bacterial species | FEN_Res no. Reads | FEN_Res Rel. abundance (%) | FEN_Sus no. reads | FEN_Sus Rel. abundance (%) | Diff. Rel abundance (%) | 95% lower CI | 95% upper CI | p-values | Corrected p-values |
|-----|-------------------|-------------------|----------------------------|-------------------|----------------------------|-------------------------|--------------|--------------|----------|--------------------|
|-----|-------------------|-------------------|----------------------------|-------------------|----------------------------|-------------------------|--------------|--------------|----------|--------------------|

**Supplementary Table 3: Significant differences between bacterial taxa detected in FEN\_Res and FEN\_Sus.**

| S/N | Bacterial Phylum             | FEN_Res Rel. abundance (%) | FEN_Sus Rel. abundance (%) | Diff. Rel abundance (%) | 95% lower CI | 95% upper CI | p-values | Corrected p-values |
|-----|------------------------------|----------------------------|----------------------------|-------------------------|--------------|--------------|----------|--------------------|
| 1   | Firmicutes                   | 0.50065135                 | 0.031911242                | 0.46874                 | 0.466735802  | 0.470744405  | <1E-301  | <1E-301            |
| 2   | Actinobacteria               | 0.04860941                 | 0.022241322                | 0.026368                | 0.025608474  | 0.027127703  | <1E-301  | <1E-301            |
| 3   | Proteobacteria               | 99.2648573                 | 99.76198786                | -0.49713                | -0.499911173 | -0.49434999  | <1E-301  | <1E-301            |
| 4   | <b>Unclassified Bacteria</b> | <b>0.17447182</b>          | <b>0.172271301</b>         | <b>0.002201</b>         |              |              |          |                    |

| S/N | Bacterial Class              | FEN_Res Rel. abundance (%) | FEN_Sus Rel. abundance (%) | Diff. Rel abundance (%) | 95% lower CI | 95% upper CI | p-values  | Corrected p-values |
|-----|------------------------------|----------------------------|----------------------------|-------------------------|--------------|--------------|-----------|--------------------|
| 1   | Bacilli                      | 0.49259176                 | 0.026219198                | 0.466373                | 0.464397032  | 0.4683481    | <1E-301   | <1E-301            |
| 2   | Actinobacteria               | 0.04780907                 | 0.022163176                | 0.025646                | 0.024890711  | 0.026401082  | <1E-301   | <1E-301            |
| 3   | Betaproteobacteria           | 0.02823082                 | 0.026017532                | 0.002213                | 0.001533599  | 0.002892977  | 2.06E-10  | 2.97E-10           |
| 4   | Flavobacteriia               | 0                          | 0.010615234                | -0.01062                | -0.010935832 | -0.010294635 | <1E-301   | <1E-301            |
| 5   | Alphaproteobacteria          | 0.04077656                 | 0.056204523                | -0.01543                | -0.0163485   | -0.014507428 | 3.55E-244 | 7.70E-244          |
| 6   | Gammaproteobacteria          | 99.1740005                 | 99.65739088                | -0.48339                | -0.486457084 | -0.480323735 | <1E-301   | <1E-301            |
| 7   | <b>Unclassified Bacteria</b> | <b>0.21659132</b>          | <b>0.201389459</b>         | <b>0.015202</b>         |              |              |           |                    |

| S/N | Bacterial order | FEN_Res Rel. abundance (%) | FEN_Sus Rel. abundance (%) | Diff. Rel abundance (%) | 95% lower CI | 95% upper CI | p-values | Corrected p-values |
|-----|-----------------|----------------------------|----------------------------|-------------------------|--------------|--------------|----------|--------------------|
|-----|-----------------|----------------------------|----------------------------|-------------------------|--------------|--------------|----------|--------------------|

| S/N | Bacterial species                                    | FEN_Res no. Reads | FEN_Res Rel. abundance (%) | FEN_Sus no. reads | FEN_Sus Rel. abundance (%) | Diff. Rel abundance (%) | 95% lower CI | 95% upper CI | p-values | Corrected p-values |
|-----|------------------------------------------------------|-------------------|----------------------------|-------------------|----------------------------|-------------------------|--------------|--------------|----------|--------------------|
| 1   | Enterobacteriales                                    | 91.1723478        | 87.50930093                | 3.663047          | 3.650172                   | 3.675921693             | <1E-301      | <1E-301      |          |                    |
| 2   | Bacillales                                           | 0.47581954        | 0.015609006                | 0.460211          | 0.458293145                | 0.462127925             | <1E-301      | <1E-301      |          |                    |
| 3   | Oceanospirillales                                    | 0.01191787        | 0                          | 0.011918          | 0.011620031                | 0.012215711             | <1E-301      | <1E-301      |          |                    |
| 4   | Micrococcales                                        | 0.0264538         | 0.01761307                 | 0.008841          | 0.008234588                | 0.009446867             | 1.05E-174    | 2.87E-174    |          |                    |
| 5   | Pasteurellales                                       | 0.0358757         | 0.029458471                | 0.006417          | 0.005674157                | 0.007160298             | 2.87E-63     | 6.16E-63     |          |                    |
| 6   | Vibrionales                                          | 0.03324795        | 0.02918622                 | 0.004062          | 0.003333742                | 0.004789723             | 1.59E-27     | 2.98E-27     |          |                    |
| 7   | Uncultured beta proteobacterium CBNPD1 BAC clone 578 | 0.01601258        | 0.013410839                | 0.002602          | 0.002102711                | 0.003100771             | 3.61E-24     | 6.38E-24     |          |                    |
| 8   | Lactobacillales                                      | 0.01154386        | 0.0102724                  | 0.001271          | 0.000840894                | 0.001702032             | 8.82E-09     | 1.47E-08     |          |                    |
| 9   | Flavobacteriales                                     | 0                 | 0.010615234                | -0.01062          | -0.010935832               | -0.010294635            | <1E-301      | <1E-301      |          |                    |
| 10  | Rhizobiales                                          | 0.0347808         | 0.0499705                  | -0.01519          | -0.01605137                | -0.014328021            | 3.56E-271    | 1.07E-270    |          |                    |
| 11  | Xanthomonadales                                      | 0                 | 0.018570987                | -0.01857          | -0.018995018               | -0.018146956            | <1E-301      | <1E-301      |          |                    |
| 12  | Pseudomonadales                                      | 7.78328629        | 11.94837432                | -4.16509          | -4.177550389               | -4.152625674            | <1E-301      | <1E-301      |          |                    |
| 13  | <b>Unclassified Bacteria</b>                         | <b>0.38792573</b> | <b>0.336528869</b>         | <b>0.051397</b>   |                            |                         |              |              |          |                    |

| S/N | Bacterial family   | FEN_Res Rel abundance (%) | FEN_Res Re. abundance (%) | Diff. Rel abundance (%) | 95% lower CI | 95% upper CI | p-values  | Corrected p-values |
|-----|--------------------|---------------------------|---------------------------|-------------------------|--------------|--------------|-----------|--------------------|
| 1   | Enterobacteriaceae | 91.1723458                | 87.50930093               | 3.663045                | 3.650170062  | 3.675919756  | <1E-301   | <1E-301            |
| 2   | Bacillaceae        | 0.4569428                 | 0                         | 0.456943                | 0.455102676  | 0.458782917  | <1E-301   | <1E-301            |
| 3   | Halomonadaceae     | 0.01129                   | 0                         | 0.01129                 | 0.011000113  | 0.011579892  | <1E-301   | <1E-301            |
| 4   | Intrasporangiaceae | 0.01079391                | 0                         | 0.010794                | 0.010510459  | 0.011077359  | <1E-301   | <1E-301            |
| 5   | Pseudomonadaceae   | 0.03687757                | 0.027852699               | 0.009025                | 0.008287267  | 0.009762483  | 2.07E-124 | 7.24E-124          |
| 6   | Pasteurellaceae    | 0.0358757                 | 0.029458471               | 0.006417                | 0.005674157  | 0.007160298  | 2.87E-63  | 7.41E-63           |
| 7   | Staphylococcaceae  | 0.01672571                | 0.012178151               | 0.004548                | 0.004055218  | 0.005039909  | 1.55E-71  | 4.48E-71           |
| 8   | Vibrionaceae       | 0.03323051                | 0.029145887               | 0.004085                | 0.003356991  | 0.004812259  | 7.35E-28  | 1.64E-27           |

| S/N | Bacterial species               | FEN_Res no. Reads | FEN_Res Rel. abundance (%) | FEN_Sus no. reads | FEN_Sus Rel. abundance (%) | Diff. Rel abundance (%) | 95% lower CI | 95% upper CI | p-values | Corrected p-values |
|-----|---------------------------------|-------------------|----------------------------|-------------------|----------------------------|-------------------------|--------------|--------------|----------|--------------------|
|     | Uncultured beta proteobacterium |                   |                            |                   |                            |                         |              |              |          |                    |
| 9   | CBNPD1 BAC clone 578            | 0.01601258        | 0.013410839                | 0.002602          | 0.002102711                | 0.003100771             | 3.61E-24     | 7.70E-24     |          |                    |
| 10  | Flavobacteriaceae               | 0                 | 0.010612713                | -0.01061          | -0.010933274               | -0.010292152            | <1E-301      | <1E-301      |          |                    |
| 11  | Bradyrhizobiaceae               | 0.02755838        | 0.044391893                | -0.01683          | -0.017630244               | -0.016036782            | <1E-301      | <1E-301      |          |                    |
| 12  | Microbacteriaceae               | 0                 | 0.01691984                 | -0.01692          | -0.017324585               | -0.016515095            | <1E-301      | <1E-301      |          |                    |
| 13  | Xanthomonadaceae                | 0                 | 0.018528133                | -0.01853          | -0.018951674               | -0.018104591            | <1E-301      | <1E-301      |          |                    |
| 14  | Moraxellaceae                   | 7.7454456         | 11.91954858                | -4.1741           | -4.186547255               | -4.161658712            | <1E-301      | <1E-301      |          |                    |
| 15  | <b>Unclassified Bacteria</b>    | <b>0.43690139</b> | <b>0.368651862</b>         | <b>0.06825</b>    |                            |                         |              |              |          |                    |

| S/N | Bacterial genera      | FEN_Res Rel. abundance (%) | FEN_Sus Rel. abundance (%) | Diff. Rel abundance (%) | 95% lower CI | 95% upper CI | p-values  | Corrected p-values |
|-----|-----------------------|----------------------------|----------------------------|-------------------------|--------------|--------------|-----------|--------------------|
| 1   | <i>Klebsiella</i>     | 77.5714371                 | 52.42357681                | 25.14786                | 25.12859794  | 25.16712269  | <1E-301   | <1E-301            |
| 2   | <i>Bacillus</i>       | 0.45586147                 | 0                          | 0.455861                | 0.454023516  | 0.45769942   | <1E-301   | <1E-301            |
| 3   | <i>Escherichia</i>    | 2.23880983                 | 1.846133059                | 0.392677                | 0.386859521  | 0.398494024  | <1E-301   | <1E-301            |
| 4   | <i>Pantoea</i>        | 0.19576895                 | 0.099865375                | 0.095904                | 0.094347753  | 0.097459406  | <1E-301   | <1E-301            |
| 5   | <i>Raoultella</i>     | 0.10322233                 | 0.075690573                | 0.027532                | 0.026306998  | 0.028756509  | <1E-301   | <1E-301            |
| 6   | <i>Salmonella</i>     | 0.73754374                 | 0.717666423                | 0.019877                | 0.016363096  | 0.023391532  | 1.70E-28  | 3.82E-28           |
| 7   | <i>Rahnella</i>       | 0.06482159                 | 0.046325373                | 0.018496                | 0.017531527  | 0.019460907  | 1.54E-301 | 6.04E-301          |
| 8   | <i>Pluralibacter</i>  | 0.04399342                 | 0.032400284                | 0.011593                | 0.010792503  | 0.012393759  | 3.40E-173 | 1.23E-172          |
| 9   | <i>Halomonas</i>      | 0.0112745                  | 0                          | 0.011274                | 0.010984809  | 0.01156419   | <1E-301   | <1E-301            |
| 10  | <i>Edwardsiella</i>   | 0.0348932                  | 0.023756343                | 0.011137                | 0.010437103  | 0.011836612  | 7.82E-208 | 2.94E-207          |
| 11  | <i>Pseudomonas</i>    | 0.03682913                 | 0.027804803                | 0.009024                | 0.008287275  | 0.009761374  | 1.37E-124 | 4.44E-124          |
| 12  | <i>Providencia</i>    | 0.02733553                 | 0.021522884                | 0.005813                | 0.005170916  | 0.006454368  | 3.26E-69  | 9.28E-69           |
| 13  | <i>Erwinia</i>        | 0.03123064                 | 0.025856198                | 0.005374                | 0.004679647  | 0.006069228  | 3.80E-51  | 9.65E-51           |
| 14  | <i>Haemophilus</i>    | 0.01701058                 | 0.01178238                 | 0.005228                | 0.004737596  | 0.005718805  | 2.40E-94  | 7.53E-94           |
| 15  | <i>Photorhabdus</i>   | 0.02268271                 | 0.017761799                | 0.004921                | 0.004337144  | 0.005504682  | 3.75E-60  | 9.78E-60           |
| 16  | <i>Photobacterium</i> | 0.01573934                 | 0.012299151                | 0.00344                 | 0.00295415   | 0.00392623   | 6.02E-43  | 1.49E-42           |
| 17  | <i>Shigella</i>       | 0.09749206                 | 0.094304414                | 0.003188                | 0.001908037  | 0.004467254  | 1.10E-06  | 1.85E-06           |

| S/N | Bacterial species                                           | FEN_Res no. Reads | FEN_Res Rel. abundance (%) | FEN_Sus no. reads | FEN_Sus Rel. abundance (%) | Diff. Rel abundance (%) | 95% lower CI | 95% upper CI | p-values | Corrected p-values |
|-----|-------------------------------------------------------------|-------------------|----------------------------|-------------------|----------------------------|-------------------------|--------------|--------------|----------|--------------------|
| 18  | <i>Staphylococcus</i>                                       | 0.0151948         | 0.01208488                 | 0.00311           | 0.002630225                | 0.003589617             | 2.53E-36     | 5.94E-36     |          |                    |
| 19  | <i>Kosakonia</i>                                            | 0.04877025        | 0.045924561                | 0.002846          | 0.001947141                | 0.003744244             | 5.99E-10     | 1.10E-09     |          |                    |
| 20  | <i>Uncultured beta proteobacterium CBNPD1 BAC clone 578</i> | 0.01601258        | 0.013410839                | 0.002602          | 0.002102711                | 0.003100771             | 3.61E-24     | 7.72E-24     |          |                    |
| 21  | <i>Vibrio</i>                                               | 0.01705515        | 0.016443403                | 0.000612          | 7.68E-05                   | 0.001146676             | 0.025561661  | 0.0393901    |          |                    |
| 22  | <i>Morganella</i>                                           | 0.01459019        | 0.015155256                | -0.00057          | -0.001070374               | -5.98E-05               | 0.028293757  | 0.042897     |          |                    |
| 23  | <i>Pectobacterium</i>                                       | 0.02095995        | 0.022332072                | -0.00137          | -0.001982209               | -0.000762035            | 1.01E-05     | 1.66E-05     |          |                    |
| 24  | <i>Xenorhabdus</i>                                          | 0.01681098        | 0.018578549                | -0.00177          | -0.002319836               | -0.001215302            | 2.97E-10     | 5.58E-10     |          |                    |
| 25  | <i>Yokenella</i>                                            | 0.02601003        | 0.027792199                | -0.00178          | -0.002462342               | -0.001102003            | 2.62E-07     | 4.56E-07     |          |                    |
| 26  | <i>Yersinia</i>                                             | 0.01403983        | 0.016271986                | -0.00223          | -0.002744059               | -0.001720246            | 7.66E-18     | 1.56E-17     |          |                    |
| 27  | <i>Cedecea</i>                                              | 0.01170858        | 0.014197339                | -0.00249          | -0.002962693               | -0.002014823            | 3.05E-25     | 6.66E-25     |          |                    |
| 28  | <i>Cronobacter</i>                                          | 0.05225841        | 0.055423065                | -0.00316          | -0.004126539               | -0.00220277             | 1.03E-10     | 2.02E-10     |          |                    |
| 29  | <i>Kluyvera</i>                                             | 0.03562765        | 0.038876308                | -0.00325          | -0.004049559               | -0.002447754            | 1.47E-15     | 2.95E-15     |          |                    |
| 30  | <i>Stenotrophomonas</i>                                     | 0                 | 0.015576236                | -0.01558          | -0.015964581               | -0.015187891            | <1E-301      | <1E-301      |          |                    |
| 31  | <i>Bradyrhizobium</i>                                       | 0.02701384        | 0.043562539                | -0.01655          | -0.017337815               | -0.015759582            | <1E-301      | <1E-301      |          |                    |
| 32  | <i>Microbacterium</i>                                       | 0                 | 0.016851778                | -0.01685          | -0.017255708               | -0.016447847            | <1E-301      | <1E-301      |          |                    |
| 33  | <i>Leclercia</i>                                            | 0.01306315        | 0.041863497                | -0.0288           | -0.029509188               | -0.028091506            | <1E-301      | <1E-301      |          |                    |
| 34  | <i>Lelliottia</i>                                           | 0                 | 0.039045204                | -0.03905          | -0.039659983               | -0.038430424            | <1E-301      | <1E-301      |          |                    |
| 35  | <i>Citrobacter</i>                                          | 0.22675154        | 0.276066656                | -0.04932          | -0.051400809               | -0.047229418            | <1E-301      | <1E-301      |          |                    |
| 36  | <i>Serratia</i>                                             | 0.05210144        | 0.114705527                | -0.0626           | -0.063827665               | -0.061380502            | <1E-301      | <1E-301      |          |                    |
| 37  | <i>Acinetobacter</i>                                        | 7.7415408         | 11.91316583                | -4.17163          | -4.184066422               | -4.159183637            | <1E-301      | <1E-301      |          |                    |
| 38  | <i>Enterobacter</i>                                         | 5.56303539        | 27.09133651                | -21.5283          | -21.5434794                | -21.51312284            | <1E-301      | <1E-301      |          |                    |
| 39  | <b>Unclassified Bacteria</b>                                | <b>4.3815093</b>  | <b>4.674589901</b>         | <b>-0.29308</b>   |                            |                         |              |              |          |                    |

| S/N | Bacterial species            | FEN_Res Rel. abundance (%) | FEN_Sus Rel. abundance (%) | Diff. Rel abundance (%) | 95% lower CI | 95% upper CI | p-values | Corrected p-values |
|-----|------------------------------|----------------------------|----------------------------|-------------------------|--------------|--------------|----------|--------------------|
| 1   | <i>Klebsiella pneumoniae</i> | 74.1765919                 | 49.91157543                | 24.26502                | 24.24540306  | 24.28462983  | <1E-301  | <1E-301            |
| 2   | <i>Escherichia coli</i>      | 2.2137513                  | 1.809107044                | 0.404644                | 0.398872188  | 0.410416318  | <1E-301  | <1E-301            |

| S/N | Bacterial species                 | FEN_Res no. Reads | FEN_Res Rel. abundance (%) | FEN_Sus no. reads | FEN_Sus Rel. abundance (%) | Diff. Rel abundance (%) | 95% lower CI | 95% upper CI | p-values | Corrected p-values |
|-----|-----------------------------------|-------------------|----------------------------|-------------------|----------------------------|-------------------------|--------------|--------------|----------|--------------------|
| 3   | <i>Klebsiella sp. MS 92-3</i>     | 0.64345651        | 0.467486215                | 0.17597           | 0.172926439                | 0.179014144             | <1E-301      | <1E-301      |          |                    |
| 4   | <i>Bacillus anthracis</i>         | 0.12361836        | 0                          | 0.123618          | 0.122659658                | 0.124577058             | <1E-301      | <1E-301      |          |                    |
| 5   | <i>[Enterobacter] aerogenes</i>   | 0.30054351        | 0.204298502                | 0.096245          | 0.094194422                | 0.098295597             | <1E-301      | <1E-301      |          |                    |
| 6   | <i>Bacillus cereus</i>            | 0.0786095         | 0                          | 0.07861           | 0.077844827                | 0.079374176             | <1E-301      | <1E-301      |          |                    |
| 7   | <i>Klebsiella oxytoca</i>         | 0.2672006         | 0.201253334                | 0.065947          | 0.063965165                | 0.067929374             | <1E-301      | <1E-301      |          |                    |
| 8   | <i>Klebsiella variicola</i>       | 0.23264847        | 0.169359737                | 0.063289          | 0.061454307                | 0.065123152             | <1E-301      | <1E-301      |          |                    |
| 9   | <i>Klebsiella quasipneumoniae</i> | 0.08545017        | 0.047858041                | 0.037592          | 0.036543894                | 0.038640355             | <1E-301      | <1E-301      |          |                    |
| 10  | <i>Klebsiella sp. 1_1_55</i>      | 0.12762393        | 0.091508809                | 0.036115          | 0.034760797                | 0.037469436             | <1E-301      | <1E-301      |          |                    |
| 11  | <i>Acinetobacter johnsonii</i>    | 0.05679689        | 0.024116823                | 0.03268           | 0.031870098                | 0.033490039             | <1E-301      | <1E-301      |          |                    |
| 12  | <i>Salmonella enterica</i>        | 0.73317385        | 0.709826628                | 0.023347          | 0.019848245                | 0.0268462               | 5.66E-39     | 1.03E-38     |          |                    |
| 13  | <i>Klebsiella michiganensis</i>   | 0.09768391        | 0.077387095                | 0.020297          | 0.019082201                | 0.021511426             | 4.38E-231    | 1.04E-230    |          |                    |
| 14  | <i>Raoultella ornithinolytica</i> | 0.07753592        | 0.058117837                | 0.019418          | 0.018350747                | 0.020485427             | 1.62E-272    | 3.93E-272    |          |                    |
| 15  | <i>Rahnella aquatilis</i>         | 0.06398637        | 0.045473331                | 0.018513          | 0.01755587                 | 0.019470209             | 9.65E-307    | 2.36E-306    |          |                    |
| 16  | <i>Klebsiella sp. OBRC7</i>       | 0.03260071        | 0.015462798                | 0.017138          | 0.016511552                | 0.017764264             | <1E-301      | <1E-301      |          |                    |
| 17  | <i>Citrobacter sp. BIDMC108</i>   | 0.0161056         | 0                          | 0.016106          | 0.015759369                | 0.016451826             | <1E-301      | <1E-301      |          |                    |
| 18  | <i>Pantoea sp. FF5</i>            | 0.01591762        | 0                          | 0.015918          | 0.015573422                | 0.016261827             | <1E-301      | <1E-301      |          |                    |
| 19  | <i>Klebsiella sp. 4_1_44FAA</i>   | 0.04023783        | 0.027872866                | 0.012365          | 0.011610476                | 0.013119457             | 1.66E-220    | 3.85E-220    |          |                    |
| 20  | <i>Bacillus thuringiensis</i>     | 0.01177447        | 0                          | 0.011774          | 0.011478426                | 0.012070512             | <1E-301      | <1E-301      |          |                    |
| 21  | <i>Citrobacter sp. MGH99</i>      | 0.01158456        | 0                          | 0.011585          | 0.011290912                | 0.011878204             | <1E-301      | <1E-301      |          |                    |
| 22  | <i>Pluralibacter gergoviae</i>    | 0.04397791        | 0.032400284                | 0.011578          | 0.010777072                | 0.012378184             | 8.95E-173    | 1.97E-172    |          |                    |
| 23  | <i>Halomonas titanicae</i>        | 0.01118148        | 0                          | 0.011181          | 0.010892989                | 0.011469975             | <1E-301      | <1E-301      |          |                    |
| 24  | <i>Edwardsiella ictaluri</i>      | 0.02704097        | 0.016657674                | 0.010383          | 0.009781196                | 0.010985398             | 1.98E-242    | 4.75E-242    |          |                    |
| 25  | <i>Klebsiella sp. 10982</i>       | 0.02454694        | 0.015263652                | 0.009283          | 0.008708417                | 0.009858155             | 5.93E-213    | 1.36E-212    |          |                    |
| 26  | <i>Citrobacter sp. BIDMC107</i>   | 0.02624063        | 0.019357487                | 0.006883          | 0.006264513                | 0.007501777             | 4.67E-103    | 9.60E-103    |          |                    |
| 27  | <i>Kosakonia radicincitans</i>    | 0.04559022        | 0.039559454                | 0.006031          | 0.005180963                | 0.006880562             | 1.76E-43     | 3.26E-43     |          |                    |
| 28  | <i>Photorhabdus luminescens</i>   | 0.02168665        | 0.016516507                | 0.00517           | 0.004603292                | 0.005736993             | 5.32E-70     | 1.03E-69     |          |                    |
| 29  | <i>Shigella sonnei</i>            | 0.04620258        | 0.041490413                | 0.004712          | 0.003848805                | 0.005575532             | 1.81E-26     | 3.16E-26     |          |                    |
| 30  | <i>Raoultella planticola</i>      | 0.01490412        | 0.011137046                | 0.003767          | 0.003299348                | 0.004234802             | 6.25E-55     | 1.17E-54     |          |                    |
| 31  | <i>Erwinia sp. 9145</i>           | 0.01633814        | 0.013597381                | 0.002741          | 0.002237511                | 0.00324401              | 3.19E-26     | 5.52E-26     |          |                    |



| S/N | Bacterial species                                           | FEN_Res no. Reads | FEN_Res Rel. abundance (%) | FEN_Sus no. reads | FEN_Sus Rel. abundance (%) | Diff. Rel abundance (%) | 95% lower CI | 95% upper CI | p-values | Corrected p-values |
|-----|-------------------------------------------------------------|-------------------|----------------------------|-------------------|----------------------------|-------------------------|--------------|--------------|----------|--------------------|
| 32  | <i>uncultured beta proteobacterium CBNPD1 BAC clone 578</i> | 0.01601258        | 0.013410839                | 0.002602          | 0.002102711                | 0.003100771             | 3.61E-24     | 6.06E-24     |          |                    |
| 33  | <i>Photobacterium sp. SKA34</i>                             | 0.01378985        | 0.011290817                | 0.002499          | 0.002038635                | 0.002959428             | 5.24E-26     | 8.99E-26     |          |                    |
| 34  | <i>Klebsiella sp. KTE92</i>                                 | 0.01257287        | 0.010300129                | 0.002273          | 0.001833062                | 0.002712418             | 9.85E-24     | 1.64E-23     |          |                    |
| 35  | <i>Klebsiella sp. AS10</i>                                  | 0.01407859        | 0.012140338                | 0.001938          | 0.001466724                | 0.00240978              | 1.19E-15     | 1.93E-15     |          |                    |
| 36  | <i>Providencia stuartii</i>                                 | 0.0144836         | 0.013158755                | 0.001325          | 0.000839862                | 0.001809836             | 9.93E-08     | 1.51E-07     |          |                    |
| 37  | <i>Morganella morganii</i>                                  | 0.01457662        | 0.015147694                | -0.00057          | -0.001076205               | -6.59E-05               | 0.026420352  | 0.0362241    |          |                    |
| 38  | <i>Shigella dysenteriae</i>                                 | 0.01367551        | 0.014855277                | -0.00118          | -0.001675365               | -0.00068416             | 2.86E-06     | 4.24E-06     |          |                    |
| 39  | <i>Citrobacter youngae</i>                                  | 0.02076035        | 0.02196403                 | -0.0012           | -0.001809616               | -0.000597744            | 9.57E-05     | 0.0001381    |          |                    |
| 40  | <i>Xenorhabdus cabanillasii</i>                             | 0.0138693         | 0.015450194                | -0.00158          | -0.002083708               | -0.001078077            | 6.07E-10     | 9.58E-10     |          |                    |
| 41  | <i>Yokenella regensburgei</i>                               | 0.02601003        | 0.027792199                | -0.00178          | -0.002462342               | -0.001102003            | 2.62E-07     | 3.94E-07     |          |                    |
| 42  | <i>Pectobacterium carotovorum</i>                           | 0.0115458         | 0.014053652                | -0.00251          | -0.002979032               | -0.00203667             | 6.40E-26     | 1.09E-25     |          |                    |
| 43  | <i>Kluyvera cryocrescens</i>                                | 0.0230761         | 0.025634365                | -0.00256          | -0.003206275               | -0.001910257            | 7.52E-15     | 1.21E-14     |          |                    |
| 44  | <i>Cronobacter sakazakii</i>                                | 0.04617739        | 0.048858812                | -0.00268          | -0.003585026               | -0.00177782             | 5.56E-09     | 8.73E-09     |          |                    |
| 45  | <i>Citrobacter sp. 30_2</i>                                 | 0.01915774        | 0.024366385                | -0.00521          | -0.005823862               | -0.004593438            | 3.08E-63     | 5.84E-63     |          |                    |
| 46  | <i>Acinetobacter oleivorans</i>                             | 0.01022418        | 0.017091257                | -0.00687          | -0.00735859                | -0.006375571            | 4.12E-174    | 9.16E-174    |          |                    |
| 47  | <i>Acinetobacter sp. WC-141</i>                             | 0.01207871        | 0.020015425                | -0.00794          | -0.008469337               | -0.007404086            | 1.45E-197    | 3.26E-197    |          |                    |
| 48  | <i>Citrobacter freundii</i>                                 | 0.03024039        | 0.039503996                | -0.00926          | -0.010042995               | -0.008484224            | 3.84E-123    | 8.12E-123    |          |                    |
| 49  | <i>Enterobacter sp. MGH 24</i>                              | 0                 | 0.010184171                | -0.01018          | -0.010498194               | -0.009870148            | <1E-301      | <1E-301      |          |                    |
| 50  | <i>Shigella boydii</i>                                      | 0                 | 0.010239629                | -0.01024          | -0.010554506               | -0.009924753            | <1E-301      | <1E-301      |          |                    |
| 51  | <i>Enterobacter sp. MGH 25</i>                              | 0                 | 0.0102724                  | -0.01027          | -0.01058778                | -0.00995702             | <1E-301      | <1E-301      |          |                    |
| 52  | <i>Enterobacter sp. GN03164</i>                             | 0                 | 0.010345504                | -0.01035          | -0.010662004               | -0.010029004            | <1E-301      | <1E-301      |          |                    |
| 53  | <i>Acinetobacter ursingii</i>                               | 0                 | 0.010549692                | -0.01055          | -0.0108693                 | -0.010230084            | <1E-301      | <1E-301      |          |                    |
| 54  | <i>Acinetobacter sp. NIPH 542</i>                           | 0                 | 0.010612713                | -0.01061          | -0.010933274               | -0.010292152            | <1E-301      | <1E-301      |          |                    |
| 55  | <i>Enterobacter sp. MGH 14</i>                              | 0                 | 0.01087488                 | -0.01087          | -0.011199375               | -0.010550384            | <1E-301      | <1E-301      |          |                    |
| 56  | <i>Acinetobacter haemolyticus</i>                           | 0                 | 0.010978234                | -0.01098          | -0.011304268               | -0.0106522              | <1E-301      | <1E-301      |          |                    |
| 57  | <i>Acinetobacter sp. ATCC 27244</i>                         | 0                 | 0.011066463                | -0.01107          | -0.011393804               | -0.010739122            | <1E-301      | <1E-301      |          |                    |
| 58  | <i>Enterobacter sp. SENG-6</i>                              | 0                 | 0.011142088                | -0.01114          | -0.011470546               | -0.01081363             | <1E-301      | <1E-301      |          |                    |
| 59  | <i>Acinetobacter junii</i>                                  | 0                 | 0.011777338                | -0.01178          | -0.012115028               | -0.011439648            | <1E-301      | <1E-301      |          |                    |
| 60  | <i>Stenotrophomonas maltophilia</i>                         | 0                 | 0.012248734                | -0.01225          | -0.012593115               | -0.011904353            | <1E-301      | <1E-301      |          |                    |

| S/N | Bacterial species                               | FEN_Res no. Reads | FEN_Res Rel. abundance (%) | FEN_Sus no. reads | FEN_Sus Rel. abundance (%) | Diff. Rel abundance (%) | 95% lower CI | 95% upper CI | p-values | Corrected p-values |
|-----|-------------------------------------------------|-------------------|----------------------------|-------------------|----------------------------|-------------------------|--------------|--------------|----------|--------------------|
| 61  | <i>Acinetobacter seifertii</i>                  | 0                 | 0.013738547                | -0.01374          | -0.014103268               | -0.013373826            | <1E-301      | <1E-301      |          |                    |
| 62  | <i>Enterobacter sp. 50858885</i>                | 0                 | 0.013859547                | -0.01386          | -0.014225871               | -0.013493224            | <1E-301      | <1E-301      |          |                    |
| 63  | <i>Acinetobacter sp. WC-136</i>                 | 0                 | 0.014194818                | -0.01419          | -0.014565546               | -0.013824091            | <1E-301      | <1E-301      |          |                    |
| 64  | <i>Acinetobacter sp. LMB-5</i>                  | 0                 | 0.014454464                | -0.01445          | -0.014828566               | -0.014080362            | <1E-301      | <1E-301      |          |                    |
| 65  | <i>Bradyrhizobium sp. DFCI-1</i>                | 0                 | 0.01495359                 | -0.01495          | -0.015334095               | -0.014573084            | <1E-301      | <1E-301      |          |                    |
| 66  | <i>Enterobacter sp. MGH 23</i>                  | 0                 | 0.016279548                | -0.01628          | -0.016676563               | -0.015882534            | <1E-301      | <1E-301      |          |                    |
| 67  | <i>Microbacterium sp. SUBG005</i>               | 0                 | 0.016801361                | -0.0168           | -0.017204687               | -0.016398035            | <1E-301      | <1E-301      |          |                    |
| 68  | <i>Enterobacter sp. 35699</i>                   | 0                 | 0.017287882                | -0.01729          | -0.017697005               | -0.016878759            | <1E-301      | <1E-301      |          |                    |
| 69  | <i>Enterobacter sp. T1-1</i>                    | 0                 | 0.019725529                | -0.01973          | -0.020162539               | -0.019288519            | <1E-301      | <1E-301      |          |                    |
| 70  | <i>Enterobacter cloacae complex sp. GN06232</i> | 0                 | 0.020020467                | -0.02002          | -0.020460731               | -0.019580202            | <1E-301      | <1E-301      |          |                    |
| 71  | <i>Enterobacter sp. FY-07</i>                   | 0.09164358        | 0.112308213                | -0.02066          | -0.021994265               | -0.019334997            | 1.03E-207    | 2.34E-207    |          |                    |
| 72  | <i>Enterobacter sp. BIDMC92</i>                 | 0                 | 0.020701092                | -0.0207           | -0.021148776               | -0.020253408            | <1E-301      | <1E-301      |          |                    |
| 73  | <i>Enterobacter sp. 638</i>                     | 0.01357281        | 0.034507702                | -0.02093          | -0.021594494               | -0.020275294            | <1E-301      | <1E-301      |          |                    |
| 74  | <i>Citrobacter koseri</i>                       | 0.04706687        | 0.072365593                | -0.0253           | -0.026323647               | -0.024273799            | <1E-301      | <1E-301      |          |                    |
| 75  | <i>Acinetobacter sp. P8-3-8</i>                 | 0.01995032        | 0.047061457                | -0.02711          | -0.027888309               | -0.026333961            | <1E-301      | <1E-301      |          |                    |
| 76  | <i>Leclercia adecarboxylata</i>                 | 0.01294106        | 0.040782059                | -0.02784          | -0.028541768               | -0.027140222            | <1E-301      | <1E-301      |          |                    |
| 77  | <i>Enterobacter sp. DC3</i>                     | 0                 | 0.028117387                | -0.02812          | -0.028639118               | -0.027595656            | <1E-301      | <1E-301      |          |                    |
| 78  | <i>Enterobacter sp. MT20</i>                    | 0                 | 0.029506366                | -0.02951          | -0.030040825               | -0.028971908            | <1E-301      | <1E-301      |          |                    |
| 79  | <i>Enterobacter xiangfangensis</i>              | 0                 | 0.032208701                | -0.03221          | -0.03276709                | -0.031650312            | <1E-301      | <1E-301      |          |                    |
| 80  | <i>Enterobacter ludwigii</i>                    | 0                 | 0.034479973                | -0.03448          | -0.035057708               | -0.033902237            | <1E-301      | <1E-301      |          |                    |
| 81  | <i>Acinetobacter soli</i>                       | 0.01168726        | 0.046607707                | -0.03492          | -0.035654006               | -0.034186878            | <1E-301      | <1E-301      |          |                    |
| 82  | <i>Acinetobacter nosocomialis</i>               | 0.01042959        | 0.046065727                | -0.03564          | -0.036359679               | -0.034912595            | <1E-301      | <1E-301      |          |                    |
| 83  | <i>Acinetobacter calcoaceticus</i>              | 0.05292891        | 0.091339913                | -0.03841          | -0.039541269               | -0.037280734            | <1E-301      | <1E-301      |          |                    |
| 84  | <i>Lelliottia amnigena</i>                      | 0                 | 0.039045204                | -0.03905          | -0.039659983               | -0.038430424            | <1E-301      | <1E-301      |          |                    |
| 85  | <i>Serratia marcescens</i>                      | 0.0299342         | 0.07716274                 | -0.04723          | -0.048213125               | -0.046243949            | <1E-301      | <1E-301      |          |                    |
| 86  | <i>Enterobacter sp. GN02548</i>                 | 0                 | 0.055720523                | -0.05572          | -0.056454879               | -0.054986167            | <1E-301      | <1E-301      |          |                    |
| 87  | <i>Enterobacter sp. UCD-UG_FMILLET</i>          | 0                 | 0.056454086                | -0.05645          | -0.057193258               | -0.055714914            | <1E-301      | <1E-301      |          |                    |
| 88  | <i>Enterobacter mori</i>                        | 0                 | 0.057333857                | -0.05733          | -0.058078763               | -0.056588951            | <1E-301      | <1E-301      |          |                    |
| 89  | <i>Enterobacter sp. DC1</i>                     | 0                 | 0.061173088                | -0.06117          | -0.061942515               | -0.060403661            | <1E-301      | <1E-301      |          |                    |

| S/N | Bacterial species                                         | FEN_Res no. Reads | FEN_Res Rel. abundance (%) | FEN_Sus no. reads | FEN_Sus Rel. abundance (%) | Diff. Rel abundance (%) | 95% lower CI | 95% upper CI | p-values | Corrected p-values |
|-----|-----------------------------------------------------------|-------------------|----------------------------|-------------------|----------------------------|-------------------------|--------------|--------------|----------|--------------------|
| 90  | <i>Enterobacter sp. GN02283</i>                           | 0                 | 0.06555934                 | -0.06556          | -0.066355857               | -0.064762823            | <1E-301      | <1E-301      |          |                    |
| 91  | <i>Enterobacter cloacae complex sp. GN04787</i>           | 0.01449329        | 0.114773589                | -0.10028          | -0.10138394                | -0.099176651            | <1E-301      | <1E-301      |          |                    |
| 92  | <i>Enterobacter sp. EGD-HP1</i>                           | 0.0243299         | 0.12815922                 | -0.10383          | -0.105021185               | -0.10263746             | <1E-301      | <1E-301      |          |                    |
| 93  | <i>Enterobacter kobei</i>                                 | 0.01764039        | 0.122845301                | -0.1052           | -0.106353578               | -0.10405625             | <1E-301      | <1E-301      |          |                    |
| 94  | <i>Enterobacter cancerogenus</i>                          | 0.03225577        | 0.163022359                | -0.13077          | -0.13211423                | -0.129418957            | <1E-301      | <1E-301      |          |                    |
| 95  | <i>Enterobacter sp. 50588862</i>                          | 0.0208243         | 0.181870638                | -0.16105          | -0.162429438               | -0.15966324             | <1E-301      | <1E-301      |          |                    |
| 96  | <i>Enterobacter sp. BIDMC 29</i>                          | 0.02562245        | 0.187199682                | -0.16158          | -0.16299147                | -0.160162987            | <1E-301      | <1E-301      |          |                    |
| 97  | <i>Enterobacter cloacae complex 'Hoffmann cluster IV'</i> | 0.07477834        | 0.288375891                | -0.2136           | -0.215425318               | -0.21176978             | <1E-301      | <1E-301      |          |                    |
| 98  | <i>Enterobacter sp. 35669</i>                             | 0.03824183        | 0.287929703                | -0.24969          | -0.251438518               | -0.247937225            | <1E-301      | <1E-301      |          |                    |
| 99  | <i>Enterobacter hormaechei</i>                            | 0.28776329        | 0.668401757                | -0.38064          | -0.383565127               | -0.377711807            | <1E-301      | <1E-301      |          |                    |
| 100 | <i>Acinetobacter baumannii</i>                            | 2.1325063         | 3.144309828                | -1.0118           | -1.018513777               | -1.00509328             | <1E-301      | <1E-301      |          |                    |
| 101 | <i>Enterobacter asburiae</i>                              | 0.28542816        | 1.381336574                | -1.09591          | -1.099821259               | -1.091995564            | <1E-301      | <1E-301      |          |                    |
| 102 | <i>Acinetobacter pittii</i>                               | 3.2170403         | 5.16661896                 | -1.94958          | -1.957982522               | -1.941174799            | <1E-301      | <1E-301      |          |                    |
| 103 | <i>Enterobacter cloacae</i>                               | 2.75678182        | 16.02785572                | -13.2711          | -13.28333312               | -13.25881469            | <1E-301      | <1E-301      |          |                    |
| 104 | <b>Unclassified Bacteria</b>                              | <b>10.760322</b>  | <b>16.36087811</b>         | <b>-5.60056</b>   |                            |                         |              |              |          |                    |
